# Supplementary material for: Revaccination with Bacille Calmette-Guérin (BCG) is associated with an increased risk of abscess and lymphadenopathy
Source: PubMed Central journal article supplement (PMC8760267; doi:10.1038/s41541-021-00421-5), 2022-01-14
Supplement: 41541_2021_421_MOESM1_ESM.pdf [file 41541_2021_421_MOESM1_ESM.pdf]

BRACE TRIAL CONSORTIUM GROUP LIST

VIC – MCRI, RCH

| Name                       | Email                                                                                | Role                                                                                |
|----------------------------|--------------------------------------------------------------------------------------|-------------------------------------------------------------------------------------|
| <b>MCRI Central Team</b>   |                                                                                      |                                                                                     |
| <b>Nigel Curtis</b>        | <a href="mailto:nigel.curtis@rch.org.au">nigel.curtis@rch.org.au</a>                 | BRACE Chief Principal Investigator                                                  |
| <b>Andrew Davidson</b>     | <a href="mailto:Andrew.Davidson@rch.org.au">Andrew.Davidson@rch.org.au</a>           | Investigator; Medical Director, MCTC                                                |
| <b>Laure Pittet</b>        | <a href="mailto:laure.pittet@mcri.edu.au">laure.pittet@mcri.edu.au</a>               | Investigator; BRACE Clinical Data Lead and Safety Lead                              |
| <b>Nicole Messina</b>      | <a href="mailto:nicole.messina@mcri.edu.au">nicole.messina@mcri.edu.au</a>           | Investigator; BRACE Laboratory Lead                                                 |
| <b>Kirsten Perrett</b>     | <a href="mailto:Kirsten.Perrett@rch.org.au">Kirsten.Perrett@rch.org.au</a>           | Investigator; Co-group Leader, Population Allergy; Clinician-Scientist Fellow, MCTC |
| <b>Amanda Gwee</b>         | <a href="mailto:Amanda.Gwee@rch.org.au">Amanda.Gwee@rch.org.au</a>                   | Investigator; Team Leader, Infectious Group, MCRI                                   |
| <b>Kaya Gardiner</b>       | <a href="mailto:kaya.gardiner@mcri.edu.au">kaya.gardiner@mcri.edu.au</a>             | Investigator; former Program Manager                                                |
| <b>Susan Perlen</b>        | <a href="mailto:susan.perlen@mcri.edu.au">susan.perlen@mcri.edu.au</a>               | Current Program Manager                                                             |
| <b>Amber Sastry</b>        | <a href="mailto:amber.sastry@mcri.edu.au">amber.sastry@mcri.edu.au</a>               | Former Program Manager                                                              |
| <b>Tenaya Jamieson</b>     | <a href="mailto:tenaya.jamieson@mcri.edu.au">tenaya.jamieson@mcri.edu.au</a>         | Senior Trial Coordinator                                                            |
| <b>Jia Wei Teo</b>         | <a href="mailto:jiawei.teo@mcri.edu.au">jiawei.teo@mcri.edu.au</a>                   | Senior Trial Coordinator                                                            |
| <b>Thilanka Morawakage</b> | <a href="mailto:thilanka.morawakage@mcri.edu.au">thilanka.morawakage@mcri.edu.au</a> | Project Assistant                                                                   |
| <b>Harriet Edmund</b>      | <a href="mailto:harriet.edmund@mcri.edu.au">harriet.edmund@mcri.edu.au</a>           | BRACE Communications Officer                                                        |
| <b>Biostatisticians</b>    |                                                                                      |                                                                                     |
| <b>Katherine Lee</b>       | <a href="mailto:katherine.lee@mcri.edu.au">katherine.lee@mcri.edu.au</a>             | Senior Biostatistician                                                              |
| <b>Francesca Orsini</b>    | <a href="mailto:francesca.orsini@mcri.edu.au">francesca.orsini@mcri.edu.au</a>       | Biostatistician                                                                     |
| <b>Cecilia Moore</b>       | <a href="mailto:cecilia.moore@mcri.edu.au">cecilia.moore@mcri.edu.au</a>             | Biostatistician                                                                     |
| <b>Data Team</b>           |                                                                                      |                                                                                     |
| <b>Laure Pittet</b>        | <a href="mailto:laure.pittet@mcri.edu.au">laure.pittet@mcri.edu.au</a>               | Investigator; Clinical Data Lead                                                    |
| <b>Ellie McDonald</b>      | <a href="mailto:ellie.mcdonald@mcri.edu.au">ellie.mcdonald@mcri.edu.au</a>           | Data Quality Senior Research Officer                                                |
| <b>Richard Hall</b>        | <a href="mailto:richard.hall@mcri.edu.au">richard.hall@mcri.edu.au</a>               | Data Manager                                                                        |

|                              |                                                                                    |                                           |
|------------------------------|------------------------------------------------------------------------------------|-------------------------------------------|
| <b>Casey Goodall</b>         | <a href="mailto:casey.goodall@mcri.edu.au">casey.goodall@mcri.edu.au</a>           | Senior Data Officer                       |
| <b>Grace Gell</b>            | <a href="mailto:grace.gell@mcri.edu.au">grace.gell@mcri.edu.au</a>                 | Data Follow-up Coordinator                |
| <b>Nathan La</b>             | <a href="mailto:nathan.la@mcri.edu.au">nathan.la@mcri.edu.au</a>                   | Data Quality RA                           |
| <b>Ann Krastev</b>           | <a href="mailto:ann.krastev@mcri.edu.au">ann.krastev@mcri.edu.au</a>               | Data Quality RA                           |
| <b>Ross Dunn</b>             | <a href="mailto:ross.dunn@mcri.edu.au">ross.dunn@mcri.edu.au</a>                   | REDCap RA                                 |
| <b>Luke Stevens</b>          | <a href="mailto:luke.stevens@mcri.edu.au">luke.stevens@mcri.edu.au</a>             | Data Management Coordinator               |
| <b>Nick McPhate</b>          | <a href="mailto:nick.mcphate@mcri.edu.au">nick.mcphate@mcri.edu.au</a>             | Original/Current BRACE Team               |
| <b>Jack Ren</b>              | <a href="mailto:jack.ren@mcri.edu.au">jack.ren@mcri.edu.au</a>                     | Start-up Data, Data Engineer, Gen V, MCRI |
| <b>Laboratory Team</b>       |                                                                                    |                                           |
| <b>Nicole Messina</b>        | <a href="mailto:nicole.messina@mcri.edu.au">nicole.messina@mcri.edu.au</a>         | Investigator; BRACE Laboratory Lead       |
| <b>Rhian Bonnici</b>         | <a href="mailto:rhian.bonnici@mcri.edu.au">rhian.bonnici@mcri.edu.au</a>           | Site Laboratory Coordinator               |
| <b>Susie Germano</b>         | <a href="mailto:susie.germano@mcri.edu.au">susie.germano@mcri.edu.au</a>           | Laboratory RA                             |
| <b>Rebecca McElroy</b>       | <a href="mailto:rebecca.mcelroy@mcri.edu.au">rebecca.mcelroy@mcri.edu.au</a>       | Laboratory RA                             |
| <b>Laboratory Scientists</b> |                                                                                    |                                           |
| <b>Ashleigh Wee-Hee</b>      | <a href="mailto:ashleigh.weehee@mcri.edu.au">ashleigh.weehee@mcri.edu.au</a>       | Regular Lab                               |
| <b>Ahmed Alamrousi</b>       | <a href="mailto:ahmed.alamrousi@mcri.edu.au">ahmed.alamrousi@mcri.edu.au</a>       | Regular Lab                               |
| <b>Belinda Ortika</b>        | <a href="mailto:belinda.ortika@mcri.edu.au">belinda.ortika@mcri.edu.au</a>         | Regular Lab                               |
| <b>Casey Pell</b>            | <a href="mailto:casey.pell@mcri.edu.au">casey.pell@mcri.edu.au</a>                 | Regular Lab                               |
| <b>Leena Spry</b>            | <a href="mailto:leena.spry@mcri.edu.au">leena.spry@mcri.edu.au</a>                 | Regular Lab                               |
| <b>Kristy Azzopardi</b>      | <a href="mailto:kristy.azzopardi@mcri.edu.au">kristy.azzopardi@mcri.edu.au</a>     | Start-up Lab                              |
| <b>Nadia Mazarakis</b>       | <a href="mailto:nadia.mazarakis@mcri.edu.au">nadia.mazarakis@mcri.edu.au</a>       | Start-up Lab                              |
| <b>Ryan Toh</b>              | <a href="mailto:zheng.quantoh@mcri.edu.au">zheng.quantoh@mcri.edu.au</a>           | Start-up Lab                              |
| <b>Vicki Bennett-Wood</b>    | <a href="mailto:vicki.bennettwood@mcri.edu.au">vicki.bennettwood@mcri.edu.au</a>   | Start-up Lab                              |
| <b>Sunitha Velagapudi</b>    | <a href="mailto:sunitha.velagapudi@mcri.edu.au">sunitha.velagapudi@mcri.edu.au</a> | Start-up Lab                              |
| <b>Jeremy Anderson</b>       | <a href="mailto:jeremy.anderson@mcri.edu.au">jeremy.anderson@mcri.edu.au</a>       | Start-up Lab                              |
| <b>Amanda Vlahos</b>         | <a href="mailto:amanda.vlahos@mcri.edu.au">amanda.vlahos@mcri.edu.au</a>           | Start-up Lab                              |
| <b>Anna Czajko</b>           | <a href="mailto:anna.czajko@mcri.edu.au">anna.czajko@mcri.edu.au</a>               | Start-up Lab                              |

| <b>Biobanking</b>                       |                                                                                            |                                                         |
|-----------------------------------------|--------------------------------------------------------------------------------------------|---------------------------------------------------------|
| <b>Benjamin Ong</b>                     | <a href="mailto:benjamin.ong@mcri.edu.au">benjamin.ong@mcri.edu.au</a>                     | Lab Support; Head of Scientific Services                |
| <b>Pedro Ramos</b>                      | <a href="mailto:pedro.ramos@mcri.edu.au">pedro.ramos@mcri.edu.au</a>                       | Biobanking Coordinator                                  |
| <b>Anushka Karunanayake</b>             | <a href="mailto:anushka.karunanayake@mcri.edu.au">anushka.karunanayake@mcri.edu.au</a>     | Biobanking Staff                                        |
| <b>Dinusha Gamage</b>                   | <a href="mailto:dinusha.gamage@mcri.edu.au">dinusha.gamage@mcri.edu.au</a>                 | Biobanking Staff                                        |
| <b>Enoshini Sooriyarachchi (Ushani)</b> | <a href="mailto:enoshini.sooriyarach@mcri.edu.au">enoshini.sooriyarach@mcri.edu.au</a>     | Biobanking Staff                                        |
| <b>Isabella Mezzetti</b>                | <a href="mailto:isabella.mezzetti@mcri.edu.au">isabella.mezzetti@mcri.edu.au</a>           | Biobanking Staff                                        |
| <b>Karina De La Cruz</b>                | <a href="mailto:karina.delacruz@mcri.edu.au">karina.delacruz@mcri.edu.au</a>               | Biobanking Staff                                        |
| <b>Ronita Singh</b>                     | <a href="mailto:ronita.singh@mcri.edu.au">ronita.singh@mcri.edu.au</a>                     | Biobanking Staff                                        |
| <b>Frances Oppedisano</b>               | <a href="mailto:frances.oppedisano@mcri.edu.au">frances.oppedisano@mcri.edu.au</a>         | Laboratory Manager                                      |
| <b>Study Visit and Phone call Staff</b> |                                                                                            |                                                         |
| <b>Veronica Abruzzo</b>                 | <a href="mailto:veronica.abruzzo@mcri.edu.au">veronica.abruzzo@mcri.edu.au</a>             | Visit coordinator; Senior Research Nurse Coordinator    |
| <b>Joyce Chan</b>                       | <a href="mailto:joyce.chan@mcri.edu.au">joyce.chan@mcri.edu.au</a>                         | Project Assistant                                       |
| <b>Jac Cushnahan</b>                    | <a href="mailto:jac.cushnahan@mcri.edu.au">jac.cushnahan@mcri.edu.au</a>                   | Clinic Staff                                            |
| <b>Emma Burrell</b>                     | <a href="mailto:emma.burrell@mcri.edu.au">emma.burrell@mcri.edu.au</a>                     | Clinic Staff                                            |
| <b>Jamie Wedderburn</b>                 | <a href="mailto:jamie.wedderburn@mcri.edu.au">jamie.wedderburn@mcri.edu.au</a>             | Clinic Staff                                            |
| <b>Sarah Fowler</b>                     | <a href="mailto:sarah.fowler@mcri.edu.au">sarah.fowler@mcri.edu.au</a>                     | Clinic Staff                                            |
| <b>Patricia Bimboese</b>                | <a href="mailto:patricia.bimboese@rch.org.au">patricia.bimboese@rch.org.au</a>             | Clinic Staff; Start-up Support; Paediatric Trainee, RCH |
| <b>Hannah Elborough</b>                 | <a href="mailto:hannah.elborough@mcri.edu.au">hannah.elborough@mcri.edu.au</a>             | Clinic Staff                                            |
| <b>Jill Nguyen</b>                      | <a href="mailto:jill.nguyen@mcri.edu.au">jill.nguyen@mcri.edu.au</a>                       | Clinic Staff                                            |
| <b>Stephanie Reynolds</b>               | <a href="mailto:steph.reynolds@mcri.edu.au">steph.reynolds@mcri.edu.au</a>                 | Clinic Staff                                            |
| <b>Liz O'Donnell</b>                    | <a href="mailto:liz.odonnell@mcri.edu.au">liz.odonnell@mcri.edu.au</a>                     | Clinic Staff                                            |
| <b>Kirsty Bowes</b>                     | <a href="mailto:kirsty.bowes@mcri.edu.au">kirsty.bowes@mcri.edu.au</a>                     | Clinic Staff                                            |
| <b>Olivia Elkington</b>                 | <a href="mailto:oelkington@student.unimelb.edu.au">oelkington@student.unimelb.edu.au</a>   | Clinic Staff                                            |
| <b>Sam Macalister</b>                   | <a href="mailto:smacalister@student.unimelb.edu.au">smacalister@student.unimelb.edu.au</a> | Clinic Staff                                            |
| <b>Catherine Flynn</b>                  | <a href="mailto:catherineflynn@hotmail.com.au">catherineflynn@hotmail.com.au</a>           | Clinic Staff                                            |
| <b>Norine Ma</b>                        | <a href="mailto:norinem@student.unimelb.edu.au">norinem@student.unimelb.edu.au</a>         | Clinic Staff                                            |

|                              |                                                                                            |                                         |
|------------------------------|--------------------------------------------------------------------------------------------|-----------------------------------------|
| <b>Bojana Gladanac</b>       | <a href="mailto:bgladanac@student.unimelb.edu.au">bgladanac@student.unimelb.edu.au</a>     | Clinic Staff                            |
| <b>Morgan Bealing</b>        | <a href="mailto:mbealing@student.unimelb.edu.au">mbealing@student.unimelb.edu.au</a>       | Clinic Staff                            |
| <b>Isabelle Ooi</b>          | <a href="mailto:wooi@student.unimelb.edu.au">wooi@student.unimelb.edu.au</a>               | Clinic Staff                            |
| <b>Nadia Olivier</b>         | <a href="mailto:nadiaolivier94@gmail.com">nadiaolivier94@gmail.com</a>                     | Clinic Staff                            |
| <b>Monique Fernandez</b>     | <a href="mailto:mfernandez1@student.unimelb.edu.au">mfernandez1@student.unimelb.edu.au</a> | Clinic Staff                            |
| <b>Angela Younes</b>         | <a href="mailto:ayounes@student.unimelb.edu.au">ayounes@student.unimelb.edu.au</a>         | Clinic Staff                            |
| <b>Kieran Fahey</b>          | <a href="mailto:kfahey@student.unimelb.edu.au">kfahey@student.unimelb.edu.au</a>           | Clinic Staff                            |
| <b>Lisa Shen</b>             | <a href="mailto:lshen1@student.unimelb.edu.au">lshen1@student.unimelb.edu.au</a>           | Clinic Staff                            |
| <b>Jesutofunmi Mojeed</b>    | <a href="mailto:jmojeed@student.unimelb.edu.au">jmojeed@student.unimelb.edu.au</a>         | Clinic Staff                            |
| <b>Orygen Group</b>          |                                                                                            | Volunteers; phone calls to participants |
| <b>Pharmacy</b>              |                                                                                            |                                         |
| <b>Donna Legge</b>           | <a href="mailto:Donna.Legge@rch.org.au">Donna.Legge@rch.org.au</a>                         | Clinical Trial Pharmacist               |
| <b>Annie Cobbledick</b>      | <a href="mailto:Annie.cobbledick@rch.org.au">Annie.cobbledick@rch.org.au</a>               | Pharmacist                              |
| <b>Kee Lim</b>               | <a href="mailto:KeeLin.Lim@rch.org.au">KeeLin.Lim@rch.org.au</a>                           | Pharmacist                              |
| <b>Jo Cheah</b>              | <a href="mailto:jo.cheah@rch.org.au">jo.cheah@rch.org.au</a>                               | Pharmacist                              |
| <b>Jason Bell</b>            | <a href="mailto:jason.bell@rch.org.au">jason.bell@rch.org.au</a>                           | Pharmacist                              |
| <b>Nurse Immuniser</b>       |                                                                                            |                                         |
| <b>Sonja Elia</b>            | <a href="mailto:sonja.elia@rch.org.au">sonja.elia@rch.org.au</a>                           | Head of Immunisation Service            |
| <b>Skye Miller</b>           | <a href="mailto:Skye.Miller@rch.org.au">Skye.Miller@rch.org.au</a>                         | Vaccinator                              |
| <b>Lynne Addlem</b>          | <a href="mailto:lynne.addlem@rch.org.au">lynne.addlem@rch.org.au</a>                       | Vaccinator                              |
| <b>Narelle Jenkins</b>       | <a href="mailto:Narelle.Jenkins@rch.org.au">Narelle.Jenkins@rch.org.au</a>                 | Vaccinator                              |
| <b>Nadine Henare</b>         | <a href="mailto:Nadine.Henare@rch.org.au">Nadine.Henare@rch.org.au</a>                     | Vaccinator                              |
| <b>Clare Brophy</b>          | <a href="mailto:Clare.brophy@mcri.edu.au">Clare.brophy@mcri.edu.au</a>                     | Vaccinator                              |
| <b>Sigrid Pitkin</b>         | <a href="mailto:sigrid.pitkin@mcri.edu.au">sigrid.pitkin@mcri.edu.au</a>                   | Vaccinator                              |
| <b>Anna Bourke</b>           | <a href="mailto:anna.bourke@mcri.edu.au">anna.bourke@mcri.edu.au</a>                       | Vaccinator                              |
| <b>Francesca Machingaifa</b> | <a href="mailto:Francesca.Machingaifa@mcri.edu.au">Francesca.Machingaifa@mcri.edu.au</a>   | Vaccinator                              |
| <b>Kirsten Mitchell</b>      | <a href="mailto:kirsten.mitchell@mcri.edu.au">kirsten.mitchell@mcri.edu.au</a>             | Vaccinator                              |

|                                      |                                                                                      |                                                                |
|--------------------------------------|--------------------------------------------------------------------------------------|----------------------------------------------------------------|
| <b>Kate Wall</b>                     | <a href="mailto:Kate.wall@mcri.edu.au">Kate.wall@mcri.edu.au</a>                     | Vaccinator                                                     |
| <b>Safety and Quality Monitoring</b> |                                                                                      |                                                                |
| <b>Laure Pittet</b>                  | <a href="mailto:laure.pittet@mcri.edu.au">laure.pittet@mcri.edu.au</a>               | Investigator; Clinical Safety Lead                             |
| <b>Paola Villanueva</b>              | <a href="mailto:Paola.Villanueva@rch.org.au">Paola.Villanueva@rch.org.au</a>         | Safety Lead, PhD student                                       |
| <b>Nigel Crawford</b>                | <a href="mailto:nigel.crawford@mcri.edu.au">nigel.crawford@mcri.edu.au</a>           | Director of SAEFVIC                                            |
| <b>Wendy Norton</b>                  | <a href="mailto:Wendy.norton@mcri.edu.au">Wendy.norton@mcri.edu.au</a>               | VIC Safety Representative                                      |
| <b>Ushma Wadia</b>                   | <a href="mailto:ushma.Wadia@telethonkids.org.au">ushma.Wadia@telethonkids.org.au</a> | WA Safety Representative                                       |
| <b>Alice Sawka</b>                   | <a href="mailto:alice.Sawka@sa.gov.au">alice.Sawka@sa.gov.au</a>                     | SA Safety Representative                                       |
| <b>Ketaki Sharma</b>                 | <a href="mailto:Ketaki.sharma@health.nsw.gov.au">Ketaki.sharma@health.nsw.gov.au</a> | NSW Safety Representative                                      |
| <b>Darren Troeman</b>                | <a href="mailto:D.P.R.Troeman@umcutrecht.nl">D.P.R.Troeman@umcutrecht.nl</a>         | Former Netherland Safety Representative                        |
| <b>Cristina Prat Aymerich</b>        | <a href="mailto:C.PratAymerich-2@umcutrecht.nl">C.PratAymerich-2@umcutrecht.nl</a>   | Spain and Netherland Safety Representative                     |
| <b>Prof Adilia Warris</b>            | <a href="mailto:A.Warris@exeter.ac.uk">A.Warris@exeter.ac.uk</a>                     | UK Safety Representative                                       |
| <b>Mariana Garcia Croda</b>          | <a href="mailto:mgcroda@gmail.com">mgcroda@gmail.com</a>                             | Brazil Safety Representative (Mato Grosso Do Sul)              |
| <b>Jorge Rocha</b>                   | <a href="mailto:jorgeluz.rocha@yahoo.com.br">jorgeluz.rocha@yahoo.com.br</a>         | Brazil Safety Representative (Rio de Janeiro)                  |
| <b>Bruno Jardim</b>                  | <a href="mailto:brunojardim89@hotmail.com">brunojardim89@hotmail.com</a>             | Brazil Safety Representative (Manaus)                          |
| <b>MCRI Start-up Team</b>            |                                                                                      |                                                                |
| <b>Carolyn Stewart</b>               | <a href="mailto:carolyn.stewart@mcri.edu.au">carolyn.stewart@mcri.edu.au</a>         | Start-up Support; Business and Operations Manager, MCTC        |
| <b>Katherine Lieschke</b>            | <a href="mailto:katherine.lieschke@mcri.edu.au">katherine.lieschke@mcri.edu.au</a>   | Start-up Support; RCH Research Ethics and Governance, MCTC     |
| <b>Jess Bucholc</b>                  | <a href="mailto:jess.bucholc@mcri.edu.au">jess.bucholc@mcri.edu.au</a>               | Start-up Support Staff; coordination Monash                    |
| <b>Samantha Bannister</b>            | <a href="mailto:Samantha.Bannister@rch.org.au">Samantha.Bannister@rch.org.au</a>     | Start-up Support; PhD Student, Infectious Diseases Group, MCRI |
| <b>Eva Sudbury</b>                   | <a href="mailto:evasudbury@gmail.com">evasudbury@gmail.com</a>                       | Start-up Support; PhD Student, Infectious Diseases Group, MCRI |
| <b>Emma Watts</b>                    | <a href="mailto:emma.watts@mcri.edu.au">emma.watts@mcri.edu.au</a>                   | Start-up Support; Regulatory Support                           |
| <b>Angela Young</b>                  | <a href="mailto:angela.young@mcri.edu.au">angela.young@mcri.edu.au</a>               | Start-up Support                                               |
| <b>Chris Richards</b>                | <a href="mailto:chris.richards@mcri.edu.au">chris.richards@mcri.edu.au</a>           | Start-up Support Grants                                        |
| <b>Christina Guo</b>                 | <a href="mailto:christina.guo@mcri.edu.au">christina.guo@mcri.edu.au</a>             | Start-up Support; Paediatric Trainee, RCH                      |
| <b>Helen Thomson</b>                 | <a href="mailto:helen.thomson@mcri.edu.au">helen.thomson@mcri.edu.au</a>             | Support Grants; Research Manager, Asia-Pacific Health, MCRI    |
| <b>Stephanie Firth</b>               | <a href="mailto:stephanie.firth@mcri.edu.au">stephanie.firth@mcri.edu.au</a>         | Start-up Support                                               |

|                            |                                                                                                |                                                                      |
|----------------------------|------------------------------------------------------------------------------------------------|----------------------------------------------------------------------|
| <b>Marianna Ciaverella</b> | <a href="mailto:marianne.ciavarella@mcri.edu.au">marianne.ciavarella@mcri.edu.au</a>           | Support Grants; Grants Manager, Grants Office, MCRI                  |
| <b>Matthew Hannan</b>      | <a href="mailto:matthew.hannan@mcri.edu.au">matthew.hannan@mcri.edu.au</a>                     | Support Grants; Head of Engagement & Philanthropy, MCRI              |
| <b>Erin Hill</b>           | <a href="mailto:erin.hill@mcri.edu.au">erin.hill@mcri.edu.au</a>                               | Start-up Support; Population Allergy, MCRI                           |
| <b>Beatriz Camesella</b>   | <a href="mailto:beatriz.camesellaper@mcri.edu.au">beatriz.camesellaper@mcri.edu.au</a>         | Start-up Support; Population Allergy, MCRI                           |
| <b>Ashleigh Rak</b>        | <a href="mailto:ashleigh.rak@mcri.edu.au">ashleigh.rak@mcri.edu.au</a>                         | Start-up Support Staff; coordination                                 |
| <b>Sasha Odoi</b>          | <a href="mailto:sasha.odoi@mcri.edu.au">sasha.odoi@mcri.edu.au</a>                             | Start-up Support Staff; coordination                                 |
| <b>Megan Mathers</b>       | <a href="mailto:megan.mathers@mcri.edu.au">megan.mathers@mcri.edu.au</a>                       | Start-up Support Staff; coordination                                 |
| <b>Sri Joshi</b>           | <a href="mailto:sri.joshi@mcri.edu.au">sri.joshi@mcri.edu.au</a>                               | Start-up support; Database Manager, MCTC                             |
| <b>Sophie Agius</b>        | <a href="mailto:sophie.agius@mcri.edu.au">sophie.agius@mcri.edu.au</a>                         | Start-up Support; logistics and consumables                          |
| <b>Alison Burns</b>        | <a href="mailto:alison.burns@mcri.edu.au">alison.burns@mcri.edu.au</a>                         | Start-up Support; logistics and consumables                          |
| <b>Leah Steve</b>          | <a href="mailto:leah.steve@mcri.edu.au">leah.steve@mcri.edu.au</a>                             | Start-up Support; logistics and consumables                          |
| <b>John Carlin</b>         | <a href="mailto:john.carlin@mcri.edu.au">john.carlin@mcri.edu.au</a>                           | Director, Clinical Epidemiology & Biostatistics, MCRI                |
| <b>Name</b>                | <b>Email</b>                                                                                   | <b>Role</b>                                                          |
| <b>Steering Committee</b>  |                                                                                                |                                                                      |
| <b>Andrew Steer</b>        | <a href="mailto:andrew.steer@rch.org.au">andrew.steer@rch.org.au</a>                           | Theme Director, Infection & Immunity, MCRI                           |
| <b>Ann Ginsberg</b>        | <a href="mailto:ann.ginsberg@gatesfoundation.org">ann.ginsberg@gatesfoundation.org</a>         | Deputy Director of TB Vaccines, Bill and Melinda Gates Foundation    |
| <b>David Paterson</b>      | <a href="mailto:d.paterson1@uq.edu.au">d.paterson1@uq.edu.au</a>                               | BRACE Steering Committee Chair                                       |
| <b>Kanta Subbarao</b>      | <a href="mailto:kanta.subbarao@influenzacentre.org">kanta.subbarao@influenzacentre.org</a>     | Director, WHO Collaborating Centre; Peter Doherty Institute          |
| <b>Kim Mulholland</b>      | <a href="mailto:kim.mulholland@mcri.edu.au">kim.mulholland@mcri.edu.au</a>                     | New Vaccines Group, MCRI                                             |
| <b>Peter Richmond</b>      | <a href="mailto:peter.richmond@uwa.edu.au">peter.richmond@uwa.edu.au</a>                       | Principal Investigator WA, TKI                                       |
| <b>Nigel Curtis</b>        | <a href="mailto:nigel.curtis@rch.org.au">nigel.curtis@rch.org.au</a>                           | BRACE Chief Principal Investigator                                   |
| <b>External Advisors</b>   |                                                                                                |                                                                      |
| <b>Mihai Netea</b>         | <a href="mailto:mihai.netea@radboudumc.nl">mihai.netea@radboudumc.nl</a>                       | Head of Experimental Medicine, The Netherlands                       |
| <b>Richard Malley</b>      | <a href="mailto:richard.malley@childrens.harvard.edu">richard.malley@childrens.harvard.edu</a> | Boston Children's Hospital; Harvard Medical School                   |
| <b>Adam Finn</b>           | <a href="mailto:adam.finn@bristol.ac.uk">adam.finn@bristol.ac.uk</a>                           | University of Bristol; NIHR Clinical Research Network; WHO           |
| <b>Denise Faustman</b>     | <a href="mailto:dfaustman@mgh.harvard.edu">dfaustman@mgh.harvard.edu</a>                       | Harvard University; Massachusetts General Hospital                   |
| <b>Frank Shann</b>         | <a href="mailto:shannf@netspace.net.au">shannf@netspace.net.au</a>                             | Start-up Support; Department of Paediatrics, University of Melbourne |

|                                       |                                                                                          |                                           |
|---------------------------------------|------------------------------------------------------------------------------------------|-------------------------------------------|
| <b>Kim Mulholland</b>                 | <a href="mailto:kim.mulholland@mcri.edu.au">kim.mulholland@mcri.edu.au</a>               | New Vaccines Group, MCRI                  |
| <b>Regulatory, Legal and Finances</b> |                                                                                          |                                           |
| <b>Penny Glenn</b>                    | <a href="mailto:penny.glenn@mcri.edu.au">penny.glenn@mcri.edu.au</a>                     | Senior Legal Counsel                      |
| <b>Laura Galletta</b>                 | <a href="mailto:laura.galletta@mcri.edu.au">laura.galletta@mcri.edu.au</a>               | Senior Study Coordinator, MCTC            |
| <b>Amandine Philippart De Floy</b>    | <a href="mailto:amandine.philippart@mcri.edu.au">amandine.philippart@mcri.edu.au</a>     | Senior Contract Manager & Privacy Officer |
| <b>Neil Harker</b>                    | <a href="mailto:neil.harker@mcri.edu.au">neil.harker@mcri.edu.au</a>                     | Financial Consultant (Insurance & Risk)   |
| <b>Karen Dalton</b>                   | <a href="mailto:karen.dalton@mcri.edu.au">karen.dalton@mcri.edu.au</a>                   | Finance                                   |
| <b>Galina Fidler</b>                  | <a href="mailto:galina.fidler@mcri.edu.au">galina.fidler@mcri.edu.au</a>                 | Finance                                   |
| <b>App Development</b>                |                                                                                          |                                           |
| <b>Ivy Xie</b>                        | <a href="mailto:ivy@curvetomorrow.com.au">ivy@curvetomorrow.com.au</a>                   | Product Manager, Curve Tomorrow           |
| <b>Sandy Buchanan</b>                 | <a href="mailto:sandy@weguide.com.au">sandy@weguide.com.au</a>                           | COO & Head of Partnerships at WeGuide     |
| <b>Thijs Sondag</b>                   | <a href="mailto:thijs.sondag@mcri.edu.au">thijs.sondag@mcri.edu.au</a>                   | Innovation Consultant, Curve Tomorrow     |
| <b>Media and Communications</b>       |                                                                                          |                                           |
| <b>Harriet Edmund</b>                 | <a href="mailto:harriet.edmund@mcri.edu.au">harriet.edmund@mcri.edu.au</a>               | BRACE Communications Officer              |
| <b>Michelle Wearing-Smith</b>         | <a href="mailto:michelle.wearingsmith@mcri.edu.au">michelle.wearingsmith@mcri.edu.au</a> | Head of Communications & Marketing        |
| <b>Tom Keeble</b>                     | <a href="mailto:tom.keeble@mcri.edu.au">tom.keeble@mcri.edu.au</a>                       | Communications Manager                    |
| <b>Bridie Byrne</b>                   | <a href="mailto:bridie.byrne@mcri.edu.au">bridie.byrne@mcri.edu.au</a>                   | Communications Specialist                 |
| <b>Belle Ngien</b>                    | <a href="mailto:belle.ngien@mcri.edu.au">belle.ngien@mcri.edu.au</a>                     | Marketing Projects Officer                |
| <b>Fran Noonan</b>                    | <a href="mailto:fran.noonan@mcri.edu.au">fran.noonan@mcri.edu.au</a>                     | Content Manager                           |
| <b>Logistics - Consumables</b>        |                                                                                          |                                           |
| <b>Sophie Agius</b>                   | <a href="mailto:sophie.agius@mcri.edu.au">sophie.agius@mcri.edu.au</a>                   | Start-up Support                          |
| <b>Alison Burns</b>                   | <a href="mailto:alison.burns@mcri.edu.au">alison.burns@mcri.edu.au</a>                   | Regular Stocks and Shipping               |
| <b>Leah Steve</b>                     | <a href="mailto:leah.steve@mcri.edu.au">leah.steve@mcri.edu.au</a>                       | Regular Stocks and Shipping               |
| <b>IT Support</b>                     |                                                                                          |                                           |
| <b>Wayne Mather</b>                   | <a href="mailto:wayne.mather@mcri.edu.au">wayne.mather@mcri.edu.au</a>                   | CIO, MCRI                                 |
| <b>Nick Evans</b>                     | <a href="mailto:nick.evans@mcri.edu.au">nick.evans@mcri.edu.au</a>                       | IT Infrastructure Manager, MCRI           |
| <b>Luke Stevens</b>                   | <a href="mailto:luke.stevens@mcri.edu.au">luke.stevens@mcri.edu.au</a>                   | REDCap expert                             |

VIC – MONASH, EPWORTH

| Name                         | Email                                                                                        | Role                  |
|------------------------------|----------------------------------------------------------------------------------------------|-----------------------|
| <b>VIC Sites</b>             |                                                                                              |                       |
| <b>Niki Tan</b>              | <a href="mailto:niki.tan@anaestheticservices.com.au">niki.tan@anaestheticservices.com.au</a> | Epworth Healthcare PI |
| <b>Diane Dawson</b>          | <a href="mailto:Di.Dawson@epworth.org.au">Di.Dawson@epworth.org.au</a>                       | Site Coordinator      |
| <b>Victoria Gordon</b>       | <a href="mailto:victoria.gordon@epworth.org.au">victoria.gordon@epworth.org.au</a>           | Research Nurse        |
| <b>Thilakavathi Chengodu</b> | <a href="mailto:thili.chengodu@epworth.org.au">thili.chengodu@epworth.org.au</a>             | Research Nurse        |
| <b>Tony Korman</b>           | <a href="mailto:tony.korman@monash.edu">tony.korman@monash.edu</a>                           | Monash PI             |
| <b>Jess O'Bryan</b>          | <a href="mailto:Jessica.O'bryan@monashhealth.org">Jessica.O'bryan@monashhealth.org</a>       | Site Coordinator      |

WA – PCH, FSH, SCGH

| Name                    | Email                                                                                          | Role                                               |
|-------------------------|------------------------------------------------------------------------------------------------|----------------------------------------------------|
| <b>WA Sites</b>         |                                                                                                |                                                    |
| <b>Peter Richmond</b>   | <a href="mailto:peter.richmond@uwa.edu.au">peter.richmond@uwa.edu.au</a>                       | Principal Investigator WA, TKI, PCH                |
| <b>Tobias Kollmann</b>  | <a href="mailto:Tobias.Kollmann@telethonkids.org.au">Tobias.Kollmann@telethonkids.org.au</a>   | Biosample and Data Use Committee WA Representative |
| <b>Ushma Wadia</b>      | <a href="mailto:ushma.Wadia@telethonkids.org.au">ushma.Wadia@telethonkids.org.au</a>           | WA Safety Representative                           |
| <b>Krist Ewe</b>        | <a href="mailto:Yean.ewe@health.wa.gov.au">Yean.ewe@health.wa.gov.au</a>                       | Sub-investigator                                   |
| <b>Jaslyn Ong</b>       | <a href="mailto:jaslyn.ong@health.wa.gov.au">jaslyn.ong@health.wa.gov.au</a>                   | Sub-investigator                                   |
| <b>Joanne Ong</b>       | <a href="mailto:Joanne.ong@telethonkids.org.au">Joanne.ong@telethonkids.org.au</a>             | Sub-investigator                                   |
| <b>Andrea Meehan</b>    | <a href="mailto:Andrea.meehan@health.wa.gov.au">Andrea.meehan@health.wa.gov.au</a>             | Sub-investigator                                   |
| <b>Carolyn Finucane</b> | <a href="mailto:Carolyn.finucane@telethonkids.org.au">Carolyn.finucane@telethonkids.org.au</a> | Research Nurse                                     |



|                           |                                                                                                  |                                                      |
|---------------------------|--------------------------------------------------------------------------------------------------|------------------------------------------------------|
| <b>Rachael Wallace</b>    | <a href="mailto:Rachael.wallace@health.wa.gov.au">Rachael.wallace@health.wa.gov.au</a>           | Research Nurse                                       |
| <b>Annabelle Arnold</b>   | <a href="mailto:Annabelle.arnold@health.wa.gov.au">Annabelle.arnold@health.wa.gov.au</a>         | Research Nurse (also helped at SCGH)                 |
| <b>Jemma Dunnill</b>      | <a href="mailto:Jemma.dunnill@telethonkids.org.au">Jemma.dunnill@telethonkids.org.au</a>         | Research Nurse/follow up                             |
| <b>Catherine Power</b>    | <a href="mailto:Catherine.power@health.wa.gov.au">Catherine.power@health.wa.gov.au</a>           | Vaccinator                                           |
| <b>Gladly Perez</b>       | <a href="mailto:Gladymar.perez@telethonkids.org.au">Gladymar.perez@telethonkids.org.au</a>       | Vaccinator                                           |
| <b>Jane Jones</b>         | <a href="mailto:Jane.jones@telethonkids.org.au">Jane.jones@telethonkids.org.au</a>               | Vaccinator/phlebotomist                              |
| <b>Camille Gibson</b>     | <a href="mailto:Camille.gibson@telethonkids.org.au">Camille.gibson@telethonkids.org.au</a>       | Vaccinator/phlebotomist                              |
| <b>Fiona McDonald</b>     | <a href="mailto:Fiona.mcdonald@telethonkids.org.au">Fiona.mcdonald@telethonkids.org.au</a>       | Vaccinator/phlebotomist/follow up                    |
| <b>Lisa Stiglmayer</b>    | <a href="mailto:Lisa.stiglmayer@health.wa.gov.au">Lisa.stiglmayer@health.wa.gov.au</a>           | Vaccinator                                           |
| <b>Sally Rogers</b>       | <a href="mailto:Sally.rogers@health.wa.gov">Sally.rogers@health.wa.gov</a>                       | Vaccinator                                           |
| <b>Lance Jarvis</b>       | <a href="mailto:Lance.jarvis@health.wa.gov.au">Lance.jarvis@health.wa.gov.au</a>                 | Vaccinator                                           |
| <b>Alexandra Truelove</b> | <a href="mailto:Alexandra.truelove@health.wa.gov.au">Alexandra.truelove@health.wa.gov.au</a>     | Vaccinator                                           |
| <b>Jennifer Kent</b>      | <a href="mailto:Jennifer.kent@telethonkids.org.au">Jennifer.kent@telethonkids.org.au</a>         | Vaccinator                                           |
| <b>Christina Anthony</b>  | <a href="mailto:Christina.anthony@telethonkids.org.au">Christina.anthony@telethonkids.org.au</a> | Phlebotomist                                         |
| <b>Beth Arrowsmith</b>    | <a href="mailto:Beth.arrowsmith@telethonkids.org.au">Beth.arrowsmith@telethonkids.org.au</a>     | Phlebotomist                                         |
| <b>Heidi Hutton</b>       | <a href="mailto:Heidi.hutton@telethonkids.org.au">Heidi.hutton@telethonkids.org.au</a>           | Phlebotomist                                         |
| <b>Lorraine Flynn</b>     | <a href="mailto:Lorraine.flynn@health.wa.gov.au">Lorraine.flynn@health.wa.gov.au</a>             | Phlebotomist                                         |
| <b>Lisa Montgomery</b>    | <a href="mailto:Lisa.montgomery@telethonkids.org.au">Lisa.montgomery@telethonkids.org.au</a>     | Phlebotomist/lab                                     |
| <b>Jan Jones</b>          | <a href="mailto:Jan.jones@telethonkids.org.au">Jan.jones@telethonkids.org.au</a>                 | Lab                                                  |
| <b>Nikki Schultz</b>      | <a href="mailto:Nikki.Schultz@telethonkids.org.au">Nikki.Schultz@telethonkids.org.au</a>         | Lab                                                  |
| <b>Sonia McAlister</b>    | <a href="mailto:Sonia.mcalister@telethonkids.org.au">Sonia.mcalister@telethonkids.org.au</a>     | Lab                                                  |
| <b>Sharon Clark</b>       | <a href="mailto:Sharon.clark@telethonkids.org.au">Sharon.clark@telethonkids.org.au</a>           | Lab                                                  |
| <b>Kimberley Parkin</b>   | <a href="mailto:Kimberley.parkin@telethonkids.org.au">Kimberley.parkin@telethonkids.org.au</a>   | Lab                                                  |
| <b>Holly Richmond</b>     | <a href="mailto:holly.richmond@telethonkids.org.au">holly.richmond@telethonkids.org.au</a>       | Follow up staff (part-time)/Site Coordinator contact |
| <b>Karen Jones</b>        | <a href="mailto:Karen.a.jones@uwa.edu.au">Karen.a.jones@uwa.edu.au</a>                           | Follow up staff                                      |
| <b>Margaret Shave</b>     | <a href="mailto:Margaret.shave@health.wa.gov.au">Margaret.shave@health.wa.gov.au</a>             | Pharmacist                                           |
| <b>Melissa O'Donnell</b>  | <a href="mailto:Melissa.o'donnell@health.wa.gov.au">Melissa.o'donnell@health.wa.gov.au</a>       | Pharmacist                                           |

|                         |                                                                                          |                                                                                                                                                                                          |
|-------------------------|------------------------------------------------------------------------------------------|------------------------------------------------------------------------------------------------------------------------------------------------------------------------------------------|
| <b>Debbie Lalich</b>    | <a href="mailto:Debbie.lalich@health.wa.gov.au">Debbie.lalich@health.wa.gov.au</a>       | Pharmacist                                                                                                                                                                               |
| <b>Justin Waring</b>    | <a href="mailto:Justin.waring@health.wa.gov.au">Justin.waring@health.wa.gov.au</a>       | Medical Director of the Anita Clayton Service- Follow up of the BCG vaccination adverse events of concern and also provision of nurses to train nurses regarding intradermal vaccination |
| <b>Laurens Manning</b>  | <a href="mailto:laurens.manning@uwa.edu.au">laurens.manning@uwa.edu.au</a>               | Fiona Stanley Hospital PI                                                                                                                                                                |
| <b>Erin Latkovic</b>    | <a href="mailto:erin.latkovic@health.wa.gov.au">erin.latkovic@health.wa.gov.au</a>       | Site Coordinator                                                                                                                                                                         |
| <b>Michelle England</b> | <a href="mailto:michelle.england@health.wa.gov.au">michelle.england@health.wa.gov.au</a> | FSH                                                                                                                                                                                      |
| <b>Michaela Lucas</b>   | <a href="mailto:michaela.lucas@uwa.edu.au">michaela.lucas@uwa.edu.au</a>                 | Sir Charles Gairdner Hospital PI                                                                                                                                                         |
| <b>Susan Herrmann</b>   | <a href="mailto:susan.herrmann@uwa.edu.au">susan.herrmann@uwa.edu.au</a>                 | Site Coordinator                                                                                                                                                                         |
| <b>Hana Karuppasamy</b> | <a href="mailto:Hana.karuppasamy@health.wa.gov.au">Hana.karuppasamy@health.wa.gov.au</a> | Research Nurse                                                                                                                                                                           |
| <b>Annabelle Arnold</b> | <a href="mailto:Annabelle.Arnold@health.wa.gov.au">Annabelle.Arnold@health.wa.gov.au</a> | Research Nurse                                                                                                                                                                           |
| <b>Zaheerah Haywood</b> | <a href="mailto:zaheerah.haywood@health.wa.gov.au">zaheerah.haywood@health.wa.gov.au</a> | Follow-up Staff                                                                                                                                                                          |
| <b>Ruth Warren</b>      | <a href="mailto:ruth.warren@uwa.edu.au">ruth.warren@uwa.edu.au</a>                       | Follow-up Staff                                                                                                                                                                          |
| <b>Nat Eiffler</b>      | <a href="mailto:Nat.Eiffler@telethonkids.org.au">Nat.Eiffler@telethonkids.org.au</a>     | WA Participant Communication Support                                                                                                                                                     |

SA – RAH, WCH

| <b>Name</b>                  | <b>Email</b>                                                                 | <b>Role</b>                       |
|------------------------------|------------------------------------------------------------------------------|-----------------------------------|
| <b>SA Sites</b>              |                                                                              |                                   |
| <b>Prof David Lynn</b>       | <a href="mailto:David.lynn@sahmri.com">David.lynn@sahmri.com</a>             | Principal Investigator SA, SAHMRI |
| <b>Prof Steve Wesselingh</b> | <a href="mailto:Steve.Wesselingh@sahmri.com">Steve.Wesselingh@sahmri.com</a> | Sub Investigator                  |
| <b>Liddy Griffith</b>        | <a href="mailto:liddy.griffith@sahmri.com">liddy.griffith@sahmri.com</a>     | Senior Study Coordinator          |
| <b>Domenic Sacca</b>         | <a href="mailto:domenic.sacca@sahmri.com">domenic.sacca@sahmri.com</a>       | Study Coordinator                 |
| <b>Angela Markow</b>         | <a href="mailto:angela.markow@sahmri.com">angela.markow@sahmri.com</a>       | Assistant Study Coordinator       |
| <b>Rochelle Botten</b>       | <a href="mailto:rochelle.botten@sahmri.com">rochelle.botten@sahmri.com</a>   | Study Coordinator                 |
| <b>Miriam Lynn</b>           | <a href="mailto:Miriam.Lynn@sahmri.com">Miriam.Lynn@sahmri.com</a>           | Lab Researcher                    |
| <b>Stephen Blake</b>         | <a href="mailto:stephen.blake@sahmri.com">stephen.blake@sahmri.com</a>       | Lab Researcher                    |
| <b>Natalie Stevens</b>       | <a href="mailto:natalie.stevens@sahmri.com">natalie.stevens@sahmri.com</a>   | Lab Researcher                    |

|                            |                                                                                        |                                    |
|----------------------------|----------------------------------------------------------------------------------------|------------------------------------|
| <b>Georgina Eden</b>       | <a href="mailto:Georgina.eden@sahmri.com">Georgina.eden@sahmri.com</a>                 | Lab Researcher                     |
| <b>Saoirse Benson</b>      | <a href="mailto:Saoirse.benson@sahmri.com">Saoirse.benson@sahmri.com</a>               | Lab Researcher                     |
| <b>Tee Yee Chern</b>       | <a href="mailto:Tee.Yee@sahmri.com">Tee.Yee@sahmri.com</a>                             | Lab Researcher                     |
| <b>Jane James</b>          | <a href="mailto:jane.james@sahmri.com">jane.james@sahmri.com</a>                       | Lab Researcher                     |
| <b>Dr Simone Barry</b>     | <a href="mailto:Simone.barry@sa.gov.au">Simone.barry@sa.gov.au</a>                     | Royal Adelaide Hospital PI         |
| <b>Catriona Doran</b>      | <a href="mailto:Catriona.Doran@sa.gov.au">Catriona.Doran@sa.gov.au</a>                 | Site Coordinator                   |
| <b>Alice Sawka</b>         | <a href="mailto:alice.Sawka@sa.gov.au">alice.Sawka@sa.gov.au</a>                       | SA Safety Representative           |
| <b>Prof Helen Marshall</b> | <a href="mailto:helen.marshall@adelaide.edu.au">helen.marshall@adelaide.edu.au</a>     | Women's and Children's Hospital PI |
| <b>Christine Heath</b>     | <a href="mailto:christine.heath@adelaide.edu.au">christine.heath@adelaide.edu.au</a>   | Site Coordinator                   |
| <b>Mark McMillan</b>       | <a href="mailto:mark.mcmillan@adelaide.edu.au">mark.mcmillan@adelaide.edu.au</a>       | Study Coordinator                  |
| <b>Meredith Krieg</b>      | <a href="mailto:meredith.krieg@adelaide.edu.au">meredith.krieg@adelaide.edu.au</a>     | Research Nurse                     |
| <b>Mary Walker</b>         | <a href="mailto:mary.walker@adelaide.edu.au">mary.walker@adelaide.edu.au</a>           | Research Nurse                     |
| <b>Louise Goodchild</b>    | <a href="mailto:louise.goodchild@adelaide.edu.au">louise.goodchild@adelaide.edu.au</a> | Research Nurse                     |
| <b>Dr Sue Evans</b>        | <a href="mailto:sue.evans@adelaide.edu.au">sue.evans@adelaide.edu.au</a>               | Research Doctor                    |

NSW – WC, WH, POWH, SCH, ST V'S

| <b>Name</b>             | <b>Email</b>                                                                               | <b>Role</b>                      |
|-------------------------|--------------------------------------------------------------------------------------------|----------------------------------|
| <b>NSW Sites</b>        |                                                                                            |                                  |
| <b>A/Prof Nick Wood</b> | <a href="mailto:nicholas.wood@health.nsw.gov.au">nicholas.wood@health.nsw.gov.au</a>       | Principal Investigator NSW, WC   |
| <b>Prof Craig Munns</b> | <a href="mailto:craig.munns@health.nsw.gov.au">craig.munns@health.nsw.gov.au</a>           | Principal Investigator NSW, WC   |
| <b>Aiken Dao</b>        | <a href="mailto:aiken.dao@sydney.edu.au">aiken.dao@sydney.edu.au</a>                       | Site Coordinator                 |
| <b>Katrina Sterling</b> | <a href="mailto:katrina.sterling@health.nsw.gov.au">katrina.sterling@health.nsw.gov.au</a> | Site Coordinator (WC, POWH, SCH) |
| <b>Lisa Pelayo</b>      | <a href="mailto:lisa.pelayo@health.nsw.gov.au">lisa.pelayo@health.nsw.gov.au</a>           | NSW State Coordinator            |
| <b>Andrew Dunn</b>      | <a href="mailto:Andrew.Dunn@health.nsw.gov.au">Andrew.Dunn@health.nsw.gov.au</a>           | Clinic Staff                     |
| <b>Therese Baulman</b>  | <a href="mailto:therese.baulman@health.nsw.gov.au">therese.baulman@health.nsw.gov.au</a>   | Vaccinator                       |
| <b>Mary Corbett</b>     | <a href="mailto:mary.corbett@health.nsw.gov.au">mary.corbett@health.nsw.gov.au</a>         | Vaccinator                       |

|                             |                                                                                                  |                                              |
|-----------------------------|--------------------------------------------------------------------------------------------------|----------------------------------------------|
| <b>Maria Desylva</b>        | <a href="mailto:maree.desylva@health.nsw.gov.au">maree.desylva@health.nsw.gov.au</a>             | Vaccinator                                   |
| <b>Rosemary Joyce</b>       | <a href="mailto:rosemary.joyce@health.nsw.gov.au">rosemary.joyce@health.nsw.gov.au</a>           | Clinical Nurse Consultant                    |
| <b>Evangeline Gardiner</b>  | <a href="mailto:Evangeline.Gardiner@health.nsw.gov.au">Evangeline.Gardiner@health.nsw.gov.au</a> | Research Assistant                           |
| <b>A/Prof Mark Douglas</b>  | <a href="mailto:mark.douglas@sydney.edu.au">mark.douglas@sydney.edu.au</a>                       | Westmead Hospital PI                         |
| <b>Clinton Colaco</b>       | <a href="mailto:Clinton.colaco@health.nsw.gov.au">Clinton.colaco@health.nsw.gov.au</a>           | Sub-investigator                             |
| <b>Kate Hamilton</b>        | <a href="mailto:Kate.Hamilton@health.nsw.gov.au">Kate.Hamilton@health.nsw.gov.au</a>             | Site Coordinator                             |
| <b>Dr Brendan McMullan</b>  | <a href="mailto:brendan.mcmullan@health.nsw.gov.au">brendan.mcmullan@health.nsw.gov.au</a>       | Sydney Children's Hospital, Randwick PI      |
| <b>Pamela Palasanthiran</b> | <a href="mailto:pamela.palasantiran@health.nsw.gov.au">pamela.palasantiran@health.nsw.gov.au</a> | Clinic Staff                                 |
| <b>Adam Bartlett</b>        | <a href="mailto:adam.bartlett@health.nsw.gov.au">adam.bartlett@health.nsw.gov.au</a>             | Clinic Staff                                 |
| <b>Phoebe Williams</b>      | <a href="mailto:phoebe.williams1@health.nsw.gov.au">phoebe.williams1@health.nsw.gov.au</a>       | Clinic Staff                                 |
| <b>A/Prof Jeffrey Post</b>  | <a href="mailto:jeffrey.post@health.nsw.gov.au">jeffrey.post@health.nsw.gov.au</a>               | Prince of Wales Hospital PI                  |
| <b>Renier Lagunday</b>      | <a href="mailto:Renier.Lagunday@health.nsw.gov.au">Renier.Lagunday@health.nsw.gov.au</a>         | Clinic Staff                                 |
| <b>Justin Beardsley</b>     | <a href="mailto:Justin.beardsley@health.nsw.gov.au">Justin.beardsley@health.nsw.gov.au</a>       | Clinic Staff                                 |
| <b>Kristen Overton</b>      | <a href="mailto:Kristen.overton@health.nsw.gov.au">Kristen.overton@health.nsw.gov.au</a>         | Clinic Staff                                 |
| <b>Nikki Bergant</b>        | <a href="mailto:nikki.bergant6@gmail.com">nikki.bergant6@gmail.com</a>                           | Vaccinator                                   |
| <b>Dr Anthony Byrne</b>     | <a href="mailto:anthony.byrne@svha.org.au">anthony.byrne@svha.org.au</a>                         | St Vincent's Hospital Sydney PI              |
| <b>Lee Mead</b>             | <a href="mailto:Lee.Mead@svha.org.au">Lee.Mead@svha.org.au</a>                                   | Site Coordinator                             |
| <b>Yasmeen Al-Hindawi</b>   | <a href="mailto:Yasmeen.Al-hindawi@svha.org.au">Yasmeen.Al-hindawi@svha.org.au</a>               | Site Investigator SVHS                       |
| <b>Sarah Barney</b>         | <a href="mailto:Sarah.Barney@svha.org.au">Sarah.Barney@svha.org.au</a>                           | Clinical Trial Assistant                     |
| <b>Nikki Bergant</b>        | <a href="mailto:nikki.bergant6@gmail.com">nikki.bergant6@gmail.com</a>                           | Vaccinator                                   |
| <b>Dr Rama Kandasamy</b>    | <a href="mailto:Rama.Kandasamy@health.nsw.gov.au">Rama.Kandasamy@health.nsw.gov.au</a>           | Key Contact                                  |
| <b>Twinkle Bahaduri</b>     | <a href="mailto:twinkle.bahaduri@health.nsw.gov.au">twinkle.bahaduri@health.nsw.gov.au</a>       | NSW Ethics/Governance Submission Coordinator |
| <b>Ketaki Sharma</b>        | <a href="mailto:Ketaki.sharma@health.nsw.gov.au">Ketaki.sharma@health.nsw.gov.au</a>             | NSW Safety Representative                    |

THE NETHERLANDS

| Name                                | Email                                                                                                                         | Role                               |
|-------------------------------------|-------------------------------------------------------------------------------------------------------------------------------|------------------------------------|
| <b>UMC Utrecht</b>                  |                                                                                                                               |                                    |
| <b>Prof Marc Bonten</b>             | <a href="mailto:m.j.m.bonten@umcutrecht.nl">m.j.m.bonten@umcutrecht.nl</a>                                                    | Sponsor Investigator - Europe PI   |
| <b>Leo Van Den Heuvel</b>           | <a href="mailto:L.M.C.v.denHeuvel-2@umcutrecht.nl">L.M.C.v.denHeuvel-2@umcutrecht.nl</a>                                      |                                    |
| <b>Cristina Prat Aymerich</b>       | <a href="mailto:C.PratAymerich-2@umcutrecht.nl">C.PratAymerich-2@umcutrecht.nl</a>                                            | Coordinating Investigator - Europe |
| <b>Nicolette van Sluis</b>          | <a href="mailto:N.L.J.vanSluis@umcutrecht.nl">N.L.J.vanSluis@umcutrecht.nl</a>                                                | Project Manager European Projects  |
| <b>Astrid Suiker</b>                | <a href="mailto:astrid.suiker@juliusclinical.com">astrid.suiker@juliusclinical.com</a>                                        | Clinical Research Associate        |
| <b>Radhika Ganpat</b>               | <a href="mailto:j.r.ganpat@umcutrecht.nl">j.r.ganpat@umcutrecht.nl</a>                                                        | Clinical Trial Assistant           |
| <b>Marije van der Waal</b>          | <a href="mailto:M.vanderWaal-13@umcutrecht.nl">M.vanderWaal-13@umcutrecht.nl</a>                                              | Junior Program Manager (Spain)     |
| <b>Sigrid van der Veen</b>          | <a href="mailto:s.vanderveen-11@umcutrecht.nl">s.vanderveen-11@umcutrecht.nl</a>                                              | Junior Program Manager (Dutch)     |
| <b>Engelien Septer-Bijleveld</b>    | <a href="mailto:engelien.septerbijleveld@juliusclinical.com">engelien.septerbijleveld@juliusclinical.com</a>                  | Sr. Project Manager                |
| <b>Titia Leurink</b>                | <a href="mailto:titia.leurink@juliusclinical.com">titia.leurink@juliusclinical.com</a>                                        | Jr. Project Manager                |
| <b>Chantal van de Ven</b>           | <a href="mailto:chantal.vandeven@juliusclinical.com">chantal.vandeven@juliusclinical.com</a>                                  | Clinical Trial Assistant           |
| <b>Axel Janssen</b>                 | <a href="mailto:a.b.janssen-9@umcutrecht.nl">a.b.janssen-9@umcutrecht.nl</a>                                                  | Head of Central Laboratory         |
| <b>Beatrijs Wolters</b>             | <a href="mailto:b.e.wolters-2@umcutrecht.nl">b.e.wolters-2@umcutrecht.nl</a>                                                  |                                    |
| <b>Darren Troeman</b>               | <a href="mailto:D.P.R.Troeman@umcutrecht.nl">D.P.R.Troeman@umcutrecht.nl</a>                                                  | Medical Monitor                    |
| <b>Toos Lemmers</b>                 | <a href="mailto:A.D.P.Lemmens-2@umcutrecht.nl">A.D.P.Lemmens-2@umcutrecht.nl</a>                                              | Study Coordinator                  |
| <b>Endriaen Prajitno</b>            | <a href="mailto:E.Prajitno@umcutrecht.nl">E.Prajitno@umcutrecht.nl</a>                                                        | Pharmacist                         |
| <b>Anne Boon</b>                    | <a href="mailto:A.Boon@umcutrecht.nl">A.Boon@umcutrecht.nl</a>                                                                | Laboratory                         |
| <b>Marjoleine van Opdorp</b>        | <a href="mailto:M.J.W.vanOpdorp@umcutrecht.nl">M.J.W.vanOpdorp@umcutrecht.nl</a>                                              | Research Nurse                     |
| <b>Amphia Hospital</b>              |                                                                                                                               |                                    |
| <b>Prof Jan Kluytmans</b>           | <a href="mailto:jankluytmans@gmail.com">jankluytmans@gmail.com</a>                                                            | Hospital PI                        |
| <b>Dr M.M.L (Miranda) van Rijen</b> | <a href="mailto:MVanRijen@amphia.nl">MVanRijen@amphia.nl</a>                                                                  | Sub Investigator                   |
| <b>Dr Wouter Bijllaardt</b>         | <a href="mailto:WBijllaardt@amphia.nl">WBijllaardt@amphia.nl</a>                                                              | Sub Investigator                   |
| <b>Linda van Mook</b>               | <a href="mailto:Lmlresearch@amphia.nl">Lmlresearch@amphia.nl</a> ; <a href="mailto:Lvanmook@amphia.nl">Lvanmook@amphia.nl</a> | Study Coordinator                  |

|                              |                                                                                                                           |                      |
|------------------------------|---------------------------------------------------------------------------------------------------------------------------|----------------------|
| <b>Jannie Romme</b>          | <a href="mailto:Lmlresearch@amphia.nl">Lmlresearch@amphia.nl</a> ; <a href="mailto:JRomme@amphia.nl">JRomme@amphia.nl</a> | Study Coordinator    |
| <b>H. van Onzenoort</b>      | <a href="mailto:trialbureau@amphia.nl">trialbureau@amphia.nl</a>                                                          | Pharmacist           |
| <b>Vivian Zwart</b>          | <a href="mailto:vzwart@amphia.nl">vzwart@amphia.nl</a>                                                                    | Vaccinator           |
| <b>Rijnstate Hospital</b>    |                                                                                                                           |                      |
| <b>Jet Gisolf</b>            | <a href="mailto:JGisolf@rijnstate.nl">JGisolf@rijnstate.nl</a>                                                            | Hospital PI          |
| <b>Dr Robert Jan Hassing</b> | <a href="mailto:RHassing@rijnstate.nl">RHassing@rijnstate.nl</a>                                                          | Sub Investigator     |
| <b>Harald Verheij</b>        | <a href="mailto:HVerheij@rijnstate.nl">HVerheij@rijnstate.nl</a>                                                          | Study Coordinator    |
| <b>P.M.G. Filius</b>         | <a href="mailto:trialapotheek@rijnstate.nl">trialapotheek@rijnstate.nl</a>                                                | Pharmacist           |
| <b>Frances Greven</b>        | <a href="mailto:Fgreven@rijnstate.nl">Fgreven@rijnstate.nl</a>                                                            | Research Nurse       |
| <b>Lieke Preijers</b>        | <a href="mailto:LPreijers@rijnstate.nl">LPreijers@rijnstate.nl</a>                                                        | Research Nurse       |
| <b>P.M.Verhoeven</b>         | <a href="mailto:pverhoeven@rijnstate.nl">pverhoeven@rijnstate.nl</a>                                                      | Research Nurse       |
| <b>J. H. van Leusen</b>      | <a href="mailto:ivanleusen@rijnstate.nl">ivanleusen@rijnstate.nl</a>                                                      | Vaccinator           |
| <b>R. C. Pon</b>             | <a href="mailto:rpon@rijnstate.nl">rpon@rijnstate.nl</a>                                                                  | Vaccinator           |
| <b>Sille Pelser</b>          | <a href="mailto:spelser@rijnstate.nl">spelser@rijnstate.nl</a>                                                            | Research Nurse       |
| <b>Marlot Uffing</b>         | <a href="mailto:muffing@rijnstate.nl">muffing@rijnstate.nl</a>                                                            | Research Nurse       |
| <b>Danique Huijbens</b>      | <a href="mailto:Dhuijbens@rijnstate.nl">Dhuijbens@rijnstate.nl</a>                                                        | Research Nurse       |
| <b>Noord West Ziekenhuis</b> |                                                                                                                           |                      |
| <b>Dr Wim Boersma</b>        | <a href="mailto:w.boersma@nwz.nl">w.boersma@nwz.nl</a>                                                                    | Hospital PI          |
| <b>Dr Nienke Paternotte</b>  | <a href="mailto:n.paternotte@nwz.nl">n.paternotte@nwz.nl</a>                                                              | Sub Investigator     |
| <b>Lida Stoojer</b>          | <a href="mailto:researchlongziekten@nwz.nl">researchlongziekten@nwz.nl</a>                                                | Study Coordinator    |
| <b>Anke Rol</b>              | <a href="mailto:researchlongziekten@nwz.nl">researchlongziekten@nwz.nl</a>                                                | Study Coordinator    |
| <b>Paul Kloeg</b>            | <a href="mailto:p.kloeg@nwz.nl">p.kloeg@nwz.nl</a>                                                                        | Pharmacist           |
| <b>Khanh Nguyen</b>          | <a href="mailto:k.nguyen@nwz.nl">k.nguyen@nwz.nl</a>                                                                      | Pharmacy Assistant   |
| <b>Kitty Molenaar</b>        | <a href="mailto:c.a.m.molenaar-groot@nwz.nl">c.a.m.molenaar-groot@nwz.nl</a>                                              | Pharmacy Coordinator |
| <b>Radboud UMC</b>           |                                                                                                                           |                      |
| <b>Dr Jaap ten Oever</b>     | <a href="mailto:Jaap.tenOever@radboudumc.nl">Jaap.tenOever@radboudumc.nl</a>                                              | Hospital PI          |
| <b>Dr Simone Moorlag</b>     | <a href="mailto:Simone.Moorlag@radboudumc.nl">Simone.Moorlag@radboudumc.nl</a>                                            | Sub Investigator     |

|                             |                                                                                              |                   |
|-----------------------------|----------------------------------------------------------------------------------------------|-------------------|
| <b>Dr Esther Taks</b>       | <a href="mailto:Esther.Taks@radboudumc.nl">Esther.Taks@radboudumc.nl</a>                     | Sub Investigator  |
| <b>Prof Mihai Netea</b>     | <a href="mailto:Mihai.Netea@radboudumc.nl">Mihai.Netea@radboudumc.nl</a>                     | Sub Investigator  |
| <b>Rob ter Heine</b>        | <a href="mailto:R.terHeine@radboudumc.nl">R.terHeine@radboudumc.nl</a>                       | Pharmacist        |
| <b>Helga Dijkstra</b>       | <a href="mailto:Helga.Dijkstra@radboudumc.nl">Helga.Dijkstra@radboudumc.nl</a>               | Laboratory        |
| <b>St Antonius Hospital</b> |                                                                                              |                   |
| <b>Dr Bob Meek</b>          | <a href="mailto:b.meek@antoniuziekenhuis.nl">b.meek@antoniuziekenhuis.nl</a>                 | Hospital PI       |
| <b>Dr Nienke Roescher</b>   | <a href="mailto:n.roescher@antoniuziekenhuis.nl">n.roescher@antoniuziekenhuis.nl</a>         | Sub Investigator  |
| <b>Kitty Blauwendraat</b>   | <a href="mailto:k.blauwendraat@antoniuziekenhuis.nl">k.blauwendraat@antoniuziekenhuis.nl</a> | Study Coordinator |
| <b>Carmen Zhou</b>          | <a href="mailto:c.zhou@antoniuziekenhuis.nl">c.zhou@antoniuziekenhuis.nl</a>                 | SC/Vaccinator     |
| <b>Houda Harbech</b>        | <a href="mailto:h.harbech@antoniuziekenhuis.nl">h.harbech@antoniuziekenhuis.nl</a>           | SC/Vaccinator     |
| <b>Menno te Riele</b>       | <a href="mailto:m.te.riele@antoniuziekenhuis.nl">m.te.riele@antoniuziekenhuis.nl</a>         | SC/Vaccinator     |

## SPAIN

| Name                                             | Email                                                                                  | Role              |
|--------------------------------------------------|----------------------------------------------------------------------------------------|-------------------|
| <b>Mutua Terrassa University Hospital</b>        |                                                                                        |                   |
| <b>Tomás Perez Porcuna</b>                       | <a href="mailto:tomasperez@mutuaterrassa.es">tomasperez@mutuaterrassa.es</a>           | Hospital PI       |
| <b>Dr Esther Calbo</b>                           | <a href="mailto:ecalbo@mutuaterrassa.es">ecalbo@mutuaterrassa.es</a>                   | Sub Investigator  |
| <b>Cristina Badia Marti</b>                      | <a href="mailto:cbadia@mutuaterrassa.cat">cbadia@mutuaterrassa.cat</a>                 | Study Coordinator |
| <b>Susana Gonzalez Marcos</b>                    |                                                                                        | Sub Investigator  |
| <b>Sonia Sallent</b>                             | <a href="mailto:ssallent@mutuaterrassa.es">ssallent@mutuaterrassa.es</a>               | Study Nurse       |
| <b>Maria Roser Font</b>                          | <a href="mailto:rfont@mutuaterrassa.es">rfont@mutuaterrassa.es</a>                     | Study Nurse       |
| <b>University Hospital Germans Trias I Pujol</b> |                                                                                        |                   |
| <b>Dr Antoni Rosell</b>                          | <a href="mailto:arosellg.germanstrias@gencat.cat">arosellg.germanstrias@gencat.cat</a> | Hospital PI       |
| <b>Adrian Siles Baena</b>                        | <a href="mailto:asiles@igtp.cat">asiles@igtp.cat</a>                                   | Pharmacist        |
| <b>Jose Dominguez</b>                            | <a href="mailto:jadomb69@gmail.com">jadomb69@gmail.com</a>                             | Laboratory        |
| <b>Ana Maria Barriocanal</b>                     | <a href="mailto:ambarriocanal@igtp.cat">ambarriocanal@igtp.cat</a>                     | Study Coordinator |

|                                            |                                                                                                                        |                            |
|--------------------------------------------|------------------------------------------------------------------------------------------------------------------------|----------------------------|
| <b>Alicia Lacom</b>                        | <a href="mailto:alacoma@igtp.cat">alacoma@igtp.cat</a>                                                                 | Study Coordinator          |
| <b>Maria Esteve</b>                        | <a href="mailto:mariaesteve.germanstrias@gencat.cat">mariaesteve.germanstrias@gencat.cat</a>                           | Researcher                 |
| <b>Irma Casas</b>                          | <a href="mailto:icasas.germanstrias@gencat.cat">icasas.germanstrias@gencat.cat</a>                                     | Researcher                 |
| <b>Guillermo Mena</b>                      | <a href="mailto:guillemena.germanstrias@gencat.cat">guillemena.germanstrias@gencat.cat</a>                             | Researcher                 |
| <b>Anabel Barriocanal</b>                  | <a href="mailto:ambarriocanal@igtp.cat">ambarriocanal@igtp.cat</a>                                                     | Researcher                 |
| <b>Sandra Vidal</b>                        | <a href="mailto:svidal@igtp.cat">svidal@igtp.cat</a>                                                                   | Research Nurse             |
| <b>Gemma Molina</b>                        | <a href="mailto:gmolina@igtp.cat">gmolina@igtp.cat</a>                                                                 | Researcher                 |
| <b>Irene Latorre</b>                       | <a href="mailto:ilatorre@igtp.cat">ilatorre@igtp.cat</a>                                                               | Researcher                 |
| <b>Barbara Molina</b>                      | <a href="mailto:bmolina@igtp.cat">bmolina@igtp.cat</a>                                                                 | Researcher                 |
| <b>Raquel Villar</b>                       | <a href="mailto:rvillar@igtp.cat">rvillar@igtp.cat</a>                                                                 | Researcher                 |
| <b>Ester Valls</b>                         |                                                                                                                        | Researcher                 |
| <b>Patricia Comella</b>                    |                                                                                                                        | Researcher                 |
| <b>University Hospital Virgen Macarena</b> |                                                                                                                        |                            |
| <b>Prof Jesús Rodríguez-Baño</b>           | <a href="mailto:jesusb@us.es">jesusb@us.es</a>                                                                         | Hospital PI                |
| <b>Lydia Barrera</b>                       | <a href="mailto:redancraid.hvm.sspa@juntadeandalucia.es">redancraid.hvm.sspa@juntadeandalucia.es</a>                   | Study Coordinator          |
| <b>Enriqueta Tristán</b>                   | <a href="mailto:redancraid.hvm.sspa@juntadeandalucia.es">redancraid.hvm.sspa@juntadeandalucia.es</a>                   | Study Coordinator          |
| <b>Jose Manuel Carrerero</b>               | <a href="mailto:ensayosclnicosmacarena@yahoo.es">ensayosclnicosmacarena@yahoo.es</a>                                   | Pharmacist                 |
| <b>Carlos García</b>                       | <a href="mailto:administracion.eecc.hvm.sspa@juntadeandalucia.es">administracion.eecc.hvm.sspa@juntadeandalucia.es</a> | Clinical Trials Management |
| <b>Almudena de la Serna</b>                | <a href="mailto:almudena.serna@juntadeandalucia.es">almudena.serna@juntadeandalucia.es</a>                             | Clinical Trials Management |
| <b>Virginia Palomo Jiménez</b>             | <a href="mailto:virgi2015@hotmail.com">virgi2015@hotmail.com</a>                                                       | Study Coordinator          |
| <b>Angel Dominguez Castellano</b>          | <a href="mailto:adomin60@gmail.com">adomin60@gmail.com</a>                                                             | Sub Investigator           |
| <b>Maria Jose Rios Vilegas</b>             | <a href="mailto:mjrivosvillegas@gmail.com">mjrivosvillegas@gmail.com</a>                                               | Sub Investigator           |
| <b>Reyes Lopez Marques</b>                 | <a href="mailto:mreyes.lopez.sspa@juntadeandalucia.es">mreyes.lopez.sspa@juntadeandalucia.es</a>                       | Sub Investigator           |
| <b>Nicolas Navarrette</b>                  | <a href="mailto:alambrada21@gmail.com">alambrada21@gmail.com</a>                                                       | Sub Investigator           |
| <b>Maria Dolores del Toro Lopez</b>        | <a href="mailto:mdeltoro@us.es">mdeltoro@us.es</a>                                                                     | Sub Investigator           |
| <b>Rosario Vigo Ortega</b>                 | <a href="mailto:charovo2102@gmail.com">charovo2102@gmail.com</a>                                                       | Research Nurse             |
| <b>David Gutierrez Campos</b>              | <a href="mailto:david.gutierrezcampos@hotmail.com">david.gutierrezcampos@hotmail.com</a>                               | Research Nurse             |



|                                                     |                                                                                                                                                             |                             |
|-----------------------------------------------------|-------------------------------------------------------------------------------------------------------------------------------------------------------------|-----------------------------|
| <b>Ana Belen Martin Gutierrez</b>                   | <a href="mailto:anab.martin.gutierrez@outlook.com">anab.martin.gutierrez@outlook.com</a>                                                                    | Research Nurse              |
| <b>Marie-Alix Clement Espindola</b>                 | <a href="mailto:mariealixclement@gmail.com">mariealixclement@gmail.com</a>                                                                                  | Research Nurse              |
| <b>Encarnacion Ramirez de Arellano</b>              | <a href="mailto:encarnacion.ramirezarellano.sspa@juntadeandalucia.es">encarnacion.ramirezarellano.sspa@juntadeandalucia.es</a>                              | Laboratory                  |
| <b>Alvaro Pascual Hernandez</b>                     |                                                                                                                                                             | Laboratory                  |
| <b>Maria Carmen Roque</b>                           | <a href="mailto:mariac.roque@juntadeandalucia.es">mariac.roque@juntadeandalucia.es</a>                                                                      | Scientific Coordinator      |
| <b>Teresa Rodrigues</b>                             | <a href="mailto:tereler@gmail.com">tereler@gmail.com</a>                                                                                                    | Laboratory                  |
| <b>Raquel Serrano</b>                               | <a href="mailto:ryrserrano@gmail.com">ryrserrano@gmail.com</a>                                                                                              | Laboratory                  |
| <b>Bouchra Daitiri</b>                              |                                                                                                                                                             | Pharmacist                  |
| <b>Ines Portillo Calderón</b>                       | <a href="mailto:ines6290@gmail.com">ines6290@gmail.com</a>                                                                                                  | Laboratory                  |
| <b>Natalia Bustos</b>                               | <a href="mailto:natalia.bustos@juntadeandalucia.es">natalia.bustos@juntadeandalucia.es</a>                                                                  | Study Coordinator           |
| <b>Rocio del Alba Rey Morillo</b>                   | <a href="mailto:rocio.rey@juntadeandalucia.es">rocio.rey@juntadeandalucia.es</a>                                                                            | Clinical Research Associate |
| <b>University Hospital Cruces</b>                   |                                                                                                                                                             |                             |
| <b>Dr. Josune Goikoetxea</b>                        | <a href="mailto:ANEJOSUNE.GOIKOETXEAAGIRRE@osakidetza.eus">ANEJOSUNE.GOIKOETXEAAGIRRE@osakidetza.eus</a>                                                    | Hospital PI                 |
| <b>Atsegiñe Cangas</b>                              | <a href="mailto:ATSEGINE.CANGAGARCES@osakidetza.eus">ATSEGINE.CANGAGARCES@osakidetza.eus</a>                                                                | Study Coordinator           |
| <b>Cristina Perez</b>                               |                                                                                                                                                             | Pharmacist                  |
| <b>Leticia Jorge</b>                                | <a href="mailto:ensayosclinicos.farmaciacruces@osakidetza.eus">ensayosclinicos.farmaciacruces@osakidetza.eus</a>                                            | Pharmacist                  |
| <b>Erika Castro</b>                                 | <a href="mailto:ERIKA.CASTROAMO@osakidetza.eus">ERIKA.CASTROAMO@osakidetza.eus</a>                                                                          | Laboratory                  |
| <b>Raquel Coya</b>                                  | <a href="mailto:RAQUEL.COYAGUERRERO@osakidetza.eus">RAQUEL.COYAGUERRERO@osakidetza.eus</a>                                                                  | Laboratory                  |
| <b>Marqués de Valdecilla University Hospital</b>    |                                                                                                                                                             |                             |
| <b>Dr María Carmen Fariñ Álvarez</b>                | <a href="mailto:mcarmen.farinas@scsalud.es">mcarmen.farinas@scsalud.es</a>                                                                                  | Hospital PI                 |
| <b>Dr Francisco Arnaiz de las Revillas Almajano</b> | <a href="mailto:francisco.arnaizlasrevillas@scsalud.es">francisco.arnaizlasrevillas@scsalud.es</a>                                                          | Sub Investigator            |
| <b>Claudia González Rico</b>                        | <a href="mailto:claudia.glez.rico@gmail.com">claudia.glez.rico@gmail.com</a> ; <a href="mailto:claudia.gonzalez@scsalud.es">claudia.gonzalez@scsalud.es</a> | Site Coordinator            |
| <b>Dr Teresa Giménez Poderos</b>                    | <a href="mailto:farmacia_ensayos.humv@scsalud.es">farmacia_ensayos.humv@scsalud.es</a>                                                                      | Pharmacist                  |
| <b>Dr Jorge Calvo Montes</b>                        | <a href="mailto:jorge.calvo@scsalud.es">jorge.calvo@scsalud.es</a>                                                                                          | Laboratory                  |
| <b>Olga Valero</b>                                  | <a href="mailto:olga.valero@scsalud.es">olga.valero@scsalud.es</a>                                                                                          | Study Nurse                 |
| <b>Noelia Vega</b>                                  | <a href="mailto:noelia.vega@scsalud.es">noelia.vega@scsalud.es</a>                                                                                          | Study Coordinator           |
| <b>Nuria Sanchez</b>                                |                                                                                                                                                             | Study Nurse                 |

|                                |                                                                                |                   |
|--------------------------------|--------------------------------------------------------------------------------|-------------------|
| <b>Blanca Sanchez</b>          |                                                                                | Study Coordinator |
| <b>Pilar Bohedo Garcia</b>     | <a href="mailto:mpilar.bohedo@scsalud.es">mpilar.bohedo@scsalud.es</a>         | Vaccinator        |
| <b>Manuel Gutierrez Cuadra</b> | <a href="mailto:manuel.gutierrezc@scsalud.es">manuel.gutierrezc@scsalud.es</a> | Sub Investigator  |

THE UK

| Name                                                    | Email                                                                      | Role                           |
|---------------------------------------------------------|----------------------------------------------------------------------------|--------------------------------|
| <b>University of Exeter/Exeter Clinical Trials Unit</b> |                                                                            |                                |
| <b>Prof John Campbell</b>                               | <a href="mailto:john.campbell@exeter.ac.uk">john.campbell@exeter.ac.uk</a> | Principal Investigator (UK)    |
| <b>Prof Adilia Warris</b>                               | <a href="mailto:A.Warris@exeter.ac.uk">A.Warris@exeter.ac.uk</a>           | Co-Principal Investigator (UK) |
| <b>Shelley Rhodes</b>                                   | <a href="mailto:S.Rhodes@exeter.ac.uk">S.Rhodes@exeter.ac.uk</a>           | Senior Trial Manager           |
| <b>Lynne Quinn</b>                                      | <a href="mailto:L.Quinn@exeter.ac.uk">L.Quinn@exeter.ac.uk</a>             | ExeCTU Director of Operations  |
| <b>Abby O'Connell</b>                                   | <a href="mailto:a.j.oconnell@exeter.ac.uk">a.j.oconnell@exeter.ac.uk</a>   | Trial Manager                  |
| <b>Emily Fletcher</b>                                   | <a href="mailto:E.Fletcher@exeter.ac.uk">E.Fletcher@exeter.ac.uk</a>       | Trial Manager                  |
| <b>Amy McAndrews</b>                                    | <a href="mailto:A.McAndrew@exeter.ac.uk">A.McAndrew@exeter.ac.uk</a>       | Trial Manager                  |
| <b>Bethany Whale</b>                                    | <a href="mailto:B.Whale@exeter.ac.uk">B.Whale@exeter.ac.uk</a>             | Trial Coordinator              |
| <b>Harry Tripp</b>                                      | <a href="mailto:H.E.Tripp@exeter.ac.uk">H.E.Tripp@exeter.ac.uk</a>         | Data Manager                   |
| <b>Rosie Owens</b>                                      | <a href="mailto:R.S.Owens@exeter.ac.uk">R.S.Owens@exeter.ac.uk</a>         | Data Manager                   |
| <b>Liam Fouracre</b>                                    | <a href="mailto:L.Fouracre@exeter.ac.uk">L.Fouracre@exeter.ac.uk</a>       | Data Manager                   |
| <b>Phoebe Dawe</b>                                      | <a href="mailto:P.Dawe@exeter.ac.uk">P.Dawe@exeter.ac.uk</a>               | Data Manager                   |
| <b>Jakob Onysk</b>                                      | <a href="mailto:jao208@exeter.ac.uk">jao208@exeter.ac.uk</a>               | Data Manager                   |
| <b>Helen Catterick</b>                                  | <a href="mailto:helen.catterick@nhs.net">helen.catterick@nhs.net</a>       | Safety Medical Doctor          |
| <b>Lorrie Symons</b>                                    | <a href="mailto:lorrie.symons@nhs.net">lorrie.symons@nhs.net</a>           | Safety Medical Doctor          |
| <b>Georgina Newman</b>                                  | <a href="mailto:gn272@exeter.ac.uk">gn272@exeter.ac.uk</a>                 | Safety Medical Doctor          |
| <b>Alison Gifford</b>                                   | <a href="mailto:ag839@exeter.ac.uk">ag839@exeter.ac.uk</a>                 | Safety Medical Doctor          |
| <b>Clare Seamark</b>                                    | <a href="mailto:clare.seamark@nhs.net">clare.seamark@nhs.net</a>           | Safety Medical Doctor          |
| <b>David Seamark</b>                                    | <a href="mailto:david.seamark@nhs.net">david.seamark@nhs.net</a>           | Safety Medical Doctor          |

|                                                    |                                                                                              |                                                |
|----------------------------------------------------|----------------------------------------------------------------------------------------------|------------------------------------------------|
| <b>Christopher Martin</b>                          | <a href="mailto:C.Martin4@exeter.ac.uk">C.Martin4@exeter.ac.uk</a>                           | Pharmacist                                     |
| <b>Marcus Mitchell</b>                             | <a href="mailto:M.R.P.Mitchell@exeter.ac.uk">M.R.P.Mitchell@exeter.ac.uk</a>                 | Laboratory Technician                          |
| <b>Louise Vennells</b>                             | <a href="mailto:L.Vennells@exeter.ac.uk">L.Vennells@exeter.ac.uk</a>                         | Senior Press and Media Manager                 |
| <b>St Leonard's Practice</b>                       |                                                                                              |                                                |
| <b>Dr Alex Harding</b>                             | <a href="mailto:a.m.harding@nhs.net">a.m.harding@nhs.net</a>                                 | Practice PI                                    |
| <b>Gemma Lockhart</b>                              | <a href="mailto:gemma.lockhart@nhs.net">gemma.lockhart@nhs.net</a>                           | Nurse                                          |
| <b>Kate Sidaway-Lee</b>                            | <a href="mailto:k.sidaway-lee@nhs.net">k.sidaway-lee@nhs.net</a>                             | Research Fellow                                |
| <b>Ide Lane Surgery</b>                            |                                                                                              |                                                |
| <b>Dr Daniel Webber-Rookes</b>                     | <a href="mailto:d.webber-rookers@nhs.net">d.webber-rookers@nhs.net</a>                       | Practice PI                                    |
| <b>Sarah Manton</b>                                | <a href="mailto:sarahmanton@nhs.net">sarahmanton@nhs.net</a>                                 | Nurse                                          |
| <b>Dr Sam Hilton</b>                               | <a href="mailto:sam.hilton@nhs.net">sam.hilton@nhs.net</a>                                   | Clinician                                      |
| <b>Travel Clinic</b>                               |                                                                                              |                                                |
| <b>James Moore</b>                                 | <a href="mailto:james@travelhealthconsultancy.co.uk">james@travelhealthconsultancy.co.uk</a> | Clinic PI/Nurse                                |
| <b>Royal Devon and Exeter NHS Foundation Trust</b> |                                                                                              |                                                |
| <b>Dr Michael Gibbons</b>                          | <a href="mailto:michael.gibbons2@nhs.net">michael.gibbons2@nhs.net</a>                       | Hospital PI                                    |
| <b>Josephine Studham</b>                           | <a href="mailto:j.m.studham@exeter.ac.uk">j.m.studham@exeter.ac.uk</a>                       | NIHR Exeter Clinical Research Facility Manager |
| <b>Bridget Knight</b>                              | <a href="mailto:B.A.Knight@exeter.ac.uk">B.A.Knight@exeter.ac.uk</a>                         | Research Nurse                                 |
| <b>Julie Moss</b>                                  | <a href="mailto:Julie.moss10@nhs.net">Julie.moss10@nhs.net</a>                               | Research Nurse                                 |
| <b>Sarah Statton</b>                               | <a href="mailto:s.statton@nhs.net">s.statton@nhs.net</a>                                     | Clinician                                      |
| <b>Glendevon Medical Practice</b>                  |                                                                                              |                                                |
| <b>Tamsin Venton</b>                               | <a href="mailto:Tamsin.venton@nhs.net">Tamsin.venton@nhs.net</a>                             | Practice PI                                    |
| <b>Will Moyle</b>                                  | <a href="mailto:will.moyle@nhs.net">will.moyle@nhs.net</a>                                   | Practice Manager                               |
| <b>Robert Harrison</b>                             | <a href="mailto:robert.harrison2@nhs.net">robert.harrison2@nhs.net</a>                       | GP                                             |
| <b>Rachel Dixon</b>                                | <a href="mailto:rdixon3@nhs.net">rdixon3@nhs.net</a>                                         | GP                                             |
| <b>Lydia Hall</b>                                  | <a href="mailto:lydiahall@nhs.net">lydiahall@nhs.net</a>                                     | Research Practitioner                          |
| <b>Jill Fairweather</b>                            | <a href="mailto:jill.fairweather@nhs.net">jill.fairweather@nhs.net</a>                       | Practice Nurse                                 |

## BRAZIL – MATO GROSSO DO SUL

| Name                                            | Email                                                                                                               | Role                        |
|-------------------------------------------------|---------------------------------------------------------------------------------------------------------------------|-----------------------------|
| <b>UEMS, Mato Grosso do Sul</b>                 |                                                                                                                     |                             |
| <b>Julio Croda</b>                              | <a href="mailto:juliocroda@gmail.com">juliocroda@gmail.com</a>                                                      | Principal Investigator (MS) |
| <b>Prof Roberto Oliveira</b>                    | <a href="mailto:roberto@uems.br">roberto@uems.br</a> ; <a href="mailto:prof.roberto@me.com">prof.roberto@me.com</a> | Study Coordinator           |
| <b>Patricia Vieira</b>                          | <a href="mailto:patriciavieira.s@hotmail.com">patriciavieira.s@hotmail.com</a>                                      | Study Coordinator           |
| <b>Daniel Tsuha</b>                             | <a href="mailto:danlnca@gmail.com">danlnca@gmail.com</a>                                                            | Data Manager                |
| <b>Marco Puga</b>                               | <a href="mailto:marco.m.puga@gmail.com">marco.m.puga@gmail.com</a>                                                  | Laboratory Lead             |
| <b>Bruna Tayara Leopoldina Meireles</b>         | <a href="mailto:bruna.tayara@hotmail.com">bruna.tayara@hotmail.com</a>                                              | Operator not blind          |
| <b>Carolinne Abreu</b>                          | <a href="mailto:abreucarolinne5@gmail.com">abreucarolinne5@gmail.com</a>                                            | Operator not blind          |
| <b>Dyenyffer Stéffany Leopoldina dos Santos</b> | <a href="mailto:dyenyffer98@hotmail.com">dyenyffer98@hotmail.com</a>                                                | Operator not blind          |
| <b>Miriam de Jesus Costa</b>                    | <a href="mailto:myricosta29@gmail.com">myricosta29@gmail.com</a>                                                    | Operator not blind          |
| <b>Caroliny Veron Ramos</b>                     | <a href="mailto:carolinyvr19@gmail.com">carolinyvr19@gmail.com</a>                                                  | Telephonist                 |
| <b>Claudinalva Ribeiro dos Santos</b>           | <a href="mailto:claudinalva2009@gmail.com">claudinalva2009@gmail.com</a>                                            | Telephonist                 |
| <b>Guilherme Teodoro de Lima</b>                | <a href="mailto:guilhermexaira@gmail.com">guilhermexaira@gmail.com</a>                                              | Telephonist                 |
| <b>Katya Martinez Almeida</b>                   | <a href="mailto:katyamartinez1982@gmail.com">katyamartinez1982@gmail.com</a>                                        | Telephonist                 |
| <b>Matheus Machado Ramos</b>                    | <a href="mailto:mrmachadobiotec@gmail.com">mrmachadobiotec@gmail.com</a>                                            | Telephonist                 |
| <b>Wellyngthon Espindola Ayala</b>              | <a href="mailto:wellyngtonespindola@gmail.com">wellyngtonespindola@gmail.com</a>                                    | Telephonist                 |
| <b>Bianca Maria Silva Menezes Arruda</b>        | <a href="mailto:biancamenezes14@hotmail.com">biancamenezes14@hotmail.com</a>                                        | Laboratory                  |
| <b>Camila Bitencourt de Andrade</b>             | <a href="mailto:camilabitencourtdeandrade@gmail.com">camilabitencourtdeandrade@gmail.com</a>                        | Laboratory                  |
| <b>Débora dos Santos Silva</b>                  | <a href="mailto:d.rodruigues85@bol.com.br">d.rodruigues85@bol.com.br</a>                                            | Laboratory                  |
| <b>Joyce dos Santos Lencina</b>                 | <a href="mailto:joycedslencina@gmail.com">joycedslencina@gmail.com</a>                                              | Laboratory                  |
| <b>Lais Alves da Cruz</b>                       | <a href="mailto:laismcr@outlook.com">laismcr@outlook.com</a>                                                        | Laboratory                  |
| <b>Mariana Mayumi Tadokoro</b>                  | <a href="mailto:mayumitadokoro@gmail.com">mayumitadokoro@gmail.com</a>                                              | Laboratory                  |
| <b>Paulo Victor Rocha da Silva</b>              | <a href="mailto:pvitor993@gmail.com">pvitor993@gmail.com</a>                                                        | Laboratory                  |
| <b>Karla Regina Warszawski de Oliveira</b>      | <a href="mailto:karlareginawo@gmail.com">karlareginawo@gmail.com</a>                                                | Pharmaceutical Head         |

|                                                         |                                                                                        |                       |
|---------------------------------------------------------|----------------------------------------------------------------------------------------|-----------------------|
| <b>Andrea Antonia Souza de Almeida dos Reis Pereira</b> | <a href="mailto:farmaceuticaandreareis@gmail.com">farmaceuticaandreareis@gmail.com</a> | Pharmaceutical        |
| <b>Iara Rodrigues Fernandes</b>                         | <a href="mailto:iara_rfernandes@yahoo.com.br">iara_rfernandes@yahoo.com.br</a>         | Pharmaceutical        |
| <b>Roberta Carolina Pereira Diogo</b>                   | <a href="mailto:roberta_rcpd@hotmail.com">roberta_rcpd@hotmail.com</a>                 | Pharmaceutical        |
| <b>Rodrigo Cezar Dutra Escobar</b>                      | <a href="mailto:rodrigo.escoba@outlook.com">rodrigo.escoba@outlook.com</a>             | Pharmaceutical        |
| <b>Adelita Agripina Refosco Barbosa</b>                 | <a href="mailto:adelita.barbosa@hotmail.com">adelita.barbosa@hotmail.com</a>           | Nurse                 |
| <b>Adriely de Oliveira</b>                              | <a href="mailto:adriely.o.b@gmail.com">adriely.o.b@gmail.com</a>                       | Nurse                 |
| <b>Felipe Zampieri Vieira Batista</b>                   | <a href="mailto:lipe_zampieri@hotmail.com">lipe_zampieri@hotmail.com</a>               | Nurse                 |
| <b>Hugo Miguel Ramos Vieira</b>                         | <a href="mailto:hugobosram@hotmail.com">hugobosram@hotmail.com</a>                     | Nurse                 |
| <b>Jhenyfer Thalyta Campos Angelo</b>                   | <a href="mailto:jhenyfer_thalyta@hotmail.com">jhenyfer_thalyta@hotmail.com</a>         | Nurse                 |
| <b>Karla Lopes dos Santos</b>                           | <a href="mailto:karla.lids@hotmail.com">karla.lids@hotmail.com</a>                     | Nurse                 |
| <b>Leticia Ramires Figueiredo</b>                       | <a href="mailto:le.enf.ramires@gmail.com">le.enf.ramires@gmail.com</a>                 | Nurse                 |
| <b>Lilian Batista Silva Muranaka</b>                    | <a href="mailto:liabatistamuranaka@gmail.com">liabatistamuranaka@gmail.com</a>         | Nurse                 |
| <b>Thaynara Haynara Souza da Rosa</b>                   | <a href="mailto:thayouza@gmail.com">thayouza@gmail.com</a>                             | Nurse                 |
| <b>Fábio Mauricio Nogueira Gomes</b>                    | <a href="mailto:fabinhomng@hotmail.com">fabinhomng@hotmail.com</a>                     | Driver                |
| <b>Leandro Galdino Cavalcanti Gonçalves</b>             | <a href="mailto:leandrogcg@gmail.com">leandrogcg@gmail.com</a>                         | Driver                |
| <b>Mariana Garcia Croda</b>                             | <a href="mailto:mgcroda@gmail.com">mgcroda@gmail.com</a>                               | Safety Monitoring     |
| <b>Matheus Vieira de Oliveira</b>                       | <a href="mailto:vieiramatheus79@gmail.com">vieiramatheus79@gmail.com</a>               | Data Manager          |
| <b>Mayara Góes dos Santos</b>                           | <a href="mailto:goes_may@hotmail.com">goes_may@hotmail.com</a>                         | Coordinator Assistant |
| <b>Fabiani de Moraes Batista</b>                        | <a href="mailto:fabianimb@hotmail.com">fabianimb@hotmail.com</a>                       | Coordinator Assistant |

BRAZIL – RIO DE JANEIRO

| Name                                | Email                                                                        | Role                         |
|-------------------------------------|------------------------------------------------------------------------------|------------------------------|
| <b>Rio de Janeiro</b>               |                                                                              |                              |
| <b>Margareth Dalcolmo</b>           | <a href="mailto:margarethdalcolmo@gmail.com">margarethdalcolmo@gmail.com</a> | Principal Investigator (Rio) |
| <b>Glauce Dos Santos</b>            | <a href="mailto:glucedossantos@gmail.com">glucedossantos@gmail.com</a>       | Study Coordinator            |
| <b>Ana Paula Conceição de Souza</b> | <a href="mailto:souzaannadi@hotmail.com">souzaannadi@hotmail.com</a>         | Assistant Coordinator        |

|                                             |                                                                                  |                          |
|---------------------------------------------|----------------------------------------------------------------------------------|--------------------------|
| <b>Ivan Maia</b>                            | <a href="mailto:ivanramosnut@gmail.com">ivanramosnut@gmail.com</a>               | Data Manager             |
| <b>Adriano Gomes</b>                        | <a href="mailto:adriano.gomes@ini.fiocruz.br">adriano.gomes@ini.fiocruz.br</a>   | Laboratory Lead          |
| <b>Alda Cruz</b>                            | <a href="mailto:alda@ioc.fiocruz.br">alda@ioc.fiocruz.br</a>                     | Laboratory Lead          |
| <b>Samyra Almeida Da Silveira</b>           | <a href="mailto:samybiologia@gmail.com">samybiologia@gmail.com</a>               | Laboratory RA            |
| <b>Maria Luciana Silva De Freitas</b>       | <a href="mailto:mluciana@id.uff.br">mluciana@id.uff.br</a>                       | Laboratory RA            |
| <b>Rosa Maria Plácido Pereira</b>           | <a href="mailto:rosamplacido@gmail.com">rosamplacido@gmail.com</a>               | Laboratory RA            |
| <b>Gabriela Correa E Castro</b>             | <a href="mailto:gabi.castro027@gmail.com">gabi.castro027@gmail.com</a>           | Laboratory RA            |
| <b>Paulo Leandro Garcia Meireles Junior</b> | <a href="mailto:paulolgmj@gmail.com">paulolgmj@gmail.com</a>                     | Laboratory RA            |
| <b>Erica Fernandes Silva</b>                | <a href="mailto:ericafernandesfarma@gmail.com">ericafernandesfarma@gmail.com</a> | Pharmacist               |
| <b>Aline Gerhardt de Oliveira</b>           | <a href="mailto:agerhardt@ensp.fiocruz.br">agerhardt@ensp.fiocruz.br</a>         | Pharmacist               |
| <b>Cristiane Machado</b>                    | <a href="mailto:cmarcondes07@gmail.com">cmarcondes07@gmail.com</a>               | Pharmacist               |
| <b>Jorge Rocha</b>                          | <a href="mailto:jorgeluiz.rocha@yahoo.com.br">jorgeluiz.rocha@yahoo.com.br</a>   | Safety Lead              |
| <b>Ligia Olívio</b>                         | <a href="mailto:ligiamon@gmail.com">ligiamon@gmail.com</a>                       | Safety Medical Doctor    |
| <b>Estela Carvalho</b>                      | <a href="mailto:estellacarvalho@gmail.com">estellacarvalho@gmail.com</a>         | Safety Medical Doctor    |
| <b>Telma Goldenberg</b>                     | <a href="mailto:telmagold@gmail.com">telmagold@gmail.com</a>                     | Safety Medical Doctor    |
| <b>Simone Collopy</b>                       | <a href="mailto:sicollopy@gmail.com">sicollopy@gmail.com</a>                     | Safety Medical Doctor    |
| <b>Girlele Pandine</b>                      | <a href="mailto:gspandine@gmail.com">gspandine@gmail.com</a>                     | Phlebotomist             |
| <b>Rafaela Silva</b>                        | <a href="mailto:rafaelaenf@yahoo.com.br">rafaelaenf@yahoo.com.br</a>             | Phlebotomist             |
| <b>Daniella Mesquita</b>                    | <a href="mailto:danielle.mesquita@gmail.com">danielle.mesquita@gmail.com</a>     | Phlebotomist             |
| <b>Cíntia Maria Lopes Alves</b>             | <a href="mailto:cintiamarialopes9@gmail.com">cintiamarialopes9@gmail.com</a>     | Phlebotomist             |
| <b>Ana Rita Lopes Souza</b>                 | <a href="mailto:nanalopes_18@hotmail.com">nanalopes_18@hotmail.com</a>           | Call Operator            |
| <b>Marilena Oliveira</b>                    | <a href="mailto:marilena_pires@hotmail.com">marilena_pires@hotmail.com</a>       | Call Operator            |
| <b>Cíntia Lopes Bogéa</b>                   | <a href="mailto:bogeacintia@gmail.com">bogeacintia@gmail.com</a>                 | Phlebotomist             |
| <b>Marciléia Soares D.Allão Chaves</b>      | <a href="mailto:marcileia.enf@gmail.com">marcileia.enf@gmail.com</a>             | Study Nurse              |
| <b>Ayla Alcoforado da Silva dos Santos</b>  | <a href="mailto:aylauanny@gmail.com">aylauanny@gmail.com</a>                     | Study Nurse              |
| <b>Renato da Costa Silva</b>                | <a href="mailto:renatocostta1212@gmail.com">renatocostta1212@gmail.com</a>       | Study Nurse              |
| <b>Marilda Siqueira</b>                     | <a href="mailto:mmsiq@ioc.fiocruz.br">mmsiq@ioc.fiocruz.br</a>                   | Virology Laboratory Lead |

## BRAZIL – MANAUS

| Name                        | Email                                                                              | Role                            |
|-----------------------------|------------------------------------------------------------------------------------|---------------------------------|
| <b>Manaus</b>               |                                                                                    |                                 |
| <b>Marcus Lacerda</b>       | <a href="mailto:marcuslacerda.br@gmail.com">marcuslacerda.br@gmail.com</a>         | Principal Investigator (Manaus) |
| <b>Bruno Jardim</b>         | <a href="mailto:brunojardim89@hotmail.com">brunojardim89@hotmail.com</a>           | Co-Principal Investigator       |
| <b>Mariana Simão</b>        | <a href="mailto:marianasimaoxavier@gmail.com">marianasimaoxavier@gmail.com</a>     | Study Coordinator               |
| <b>Fernando Val</b>         | <a href="mailto:ffaval@gmail.com">ffaval@gmail.com</a>                             | Study Coordinator               |
| <b>Larissa Brasil</b>       | <a href="mailto:larissa_brasil@hotmail.com">larissa_brasil@hotmail.com</a>         | Laboratory Head                 |
| <b>Christiane Prado</b>     | <a href="mailto:christianeprado95@gmail.com">christianeprado95@gmail.com</a>       | Nurse Leader                    |
| <b>Kelry Mazurega</b>       | <a href="mailto:kelryoliveira27@gmail.com">kelryoliveira27@gmail.com</a>           | Pharmacist Leader               |
| <b>Vanderson Sampaio</b>    | <a href="mailto:vandersons@gmail.com">vandersons@gmail.com</a>                     | Data Manager                    |
| <b>Anna Gabriela Santos</b> | <a href="mailto:annagabrielarezende@gmail.com">annagabrielarezende@gmail.com</a>   | Call Center Head                |
| <b>Tyane Jardim</b>         | <a href="mailto:tyane_almeida@hotmail.com">tyane_almeida@hotmail.com</a>           | Safety Medical Doctor           |
| <b>Bernardo Maia</b>        | <a href="mailto:bernardo.mpesq88@gmail.com">bernardo.mpesq88@gmail.com</a>         | Data Assistant                  |
| <b>Ariandra Sartim</b>      | <a href="mailto:ariandrag@hotmail.com">ariandrag@hotmail.com</a>                   | Pharmacist                      |
| <b>Alexandre Trindade</b>   | <a href="mailto:atrindade15@gmail.com">atrindade15@gmail.com</a>                   | Pharmacist                      |
| <b>Rosangela Melo</b>       | <a href="mailto:tanantasmelo@gmail.com">tanantasmelo@gmail.com</a>                 | Pharmacist                      |
| <b>Arthur Otsuka</b>        | <a href="mailto:arthurfarmaceutico@outlook.com">arthurfarmaceutico@outlook.com</a> | Pharmacist                      |
| <b>Dayanne Barros</b>       | <a href="mailto:dayanne.barrosk@gmail.com">dayanne.barrosk@gmail.com</a>           | Pharmacist                      |
| <b>Ana Carolina Furtado</b> | <a href="mailto:acazevedofurtado@gmail.com">acazevedofurtado@gmail.com</a>         | Call Operator                   |
| <b>Rayssa Paes</b>          | <a href="mailto:Rayssapaesv2@gmail.com">Rayssapaesv2@gmail.com</a>                 | Call Operator                   |
| <b>Ramon Castro</b>         | <a href="mailto:rmnpeixoto@outlook.com">rmnpeixoto@outlook.com</a>                 | Call Operator                   |
| <b>Ana Greyce Capella</b>   | <a href="mailto:Ana.g.capella@gmail.com">Ana.g.capella@gmail.com</a>               | Call Operator                   |
| <b>Daniel Santos</b>        | <a href="mailto:elguedes07@gmail.com">elguedes07@gmail.com</a>                     | Call Operator                   |
| <b>Erlane Costa</b>         | <a href="mailto:erlanesantiago72854@gmail.com">erlanesantiago72854@gmail.com</a>   | Call Operator                   |
| <b>Larissa Gama</b>         | <a href="mailto:Larissamotag@gmail.com">Larissamotag@gmail.com</a>                 | Call Operator                   |

|                                |                                                                                  |                      |
|--------------------------------|----------------------------------------------------------------------------------|----------------------|
| <b>Maria Gabriela Oliveira</b> | <a href="mailto:Mgvdo.enf16@uea.edu.br">Mgvdo.enf16@uea.edu.br</a>               | Call Operator        |
| <b>Thamires Freitas</b>        | <a href="mailto:mesquita.thamires24@gmail.com">mesquita.thamires24@gmail.com</a> | Call Operator        |
| <b>Antonny Sousa</b>           | <a href="mailto:michaelantonny@gmail.com">michaelantonny@gmail.com</a>           | Data quality control |
| <b>Thais Oliveira</b>          | <a href="mailto:tgo.enf19@gmail.com">tgo.enf19@gmail.com</a>                     | Nurse                |
| <b>Juliana Silva</b>           | <a href="mailto:julianansilva22@gmail.com">julianansilva22@gmail.com</a>         | Nurse                |
| <b>Adria Vasconcelos</b>       | <a href="mailto:adria.lemos22@gmail.com">adria.lemos22@gmail.com</a>             | Nurse                |
| <b>Joel Junior</b>             | <a href="mailto:joeljuniorifpa@gmail.com">joeljuniorifpa@gmail.com</a>           | Nurse                |
| <b>Elizandra Nascimento</b>    | <a href="mailto:eliizandrafn@gmail.com">eliizandrafn@gmail.com</a>               | Nurse                |
| <b>Tilza Santos</b>            | <a href="mailto:thilzadepaula@gmail.com">thilzadepaula@gmail.com</a>             | Nurse                |
| <b>Evelyn Queiroz</b>          | <a href="mailto:Evelyn.queiroz24@hotmail.com">Evelyn.queiroz24@hotmail.com</a>   | Nurse                |
| <b>Handerson Pereira</b>       | <a href="mailto:handersonsilva13@hotmail.com">handersonsilva13@hotmail.com</a>   | Nurse                |
| <b>Laleyska Rodrigues</b>      | <a href="mailto:Laleyska@gmail.com">Laleyska@gmail.com</a>                       | Nurse                |
| <b>Fabiane Bianca Barbosa</b>  | <a href="mailto:bianca.albar11@gmail.com">bianca.albar11@gmail.com</a>           | Laboratory           |
| <b>Juliana Neves</b>           | <a href="mailto:neves.juh.costa@gmail.com">neves.juh.costa@gmail.com</a>         | Laboratory           |
| <b>Emanuelle Silva</b>         | <a href="mailto:emanuellelira96@gmail.com">emanuellelira96@gmail.com</a>         | Laboratory           |
| <b>Adriana Marins</b>          | <a href="mailto:dricka.ferreira16@hotmail.com">dricka.ferreira16@hotmail.com</a> | Laboratory           |
| <b>Bebeto Rodrigues</b>        | <a href="mailto:b.rodrigues1403@gmail.com">b.rodrigues1403@gmail.com</a>         | Laboratory           |
| <b>Paulo Henrique Andrade</b>  | <a href="mailto:andrade.biomedi@gmail.com">andrade.biomedi@gmail.com</a>         | Laboratory           |
| <b>Ingrid Oliveira</b>         | <a href="mailto:ingrid.igor30@gmail.com">ingrid.igor30@gmail.com</a>             | Laboratory           |
| <b>Gabrielle Pereira</b>       | <a href="mailto:gabriellepereira61@gmail.com">gabriellepereira61@gmail.com</a>   | Laboratory           |
| <b>Vanessa Godinho</b>         | <a href="mailto:vanessa.vk.castro@gmail.com">vanessa.vk.castro@gmail.com</a>     | Laboratory           |
